# Supplementary material for: DFT insight into axial ligand effects on electronic structure and mechanistic reactivity of oxoiron(iv) porphyrin
Source: Royal Society of Chemistry journal article supplement (doi:10.1039/d0cp01867h), 2020-01-01
Supplement: d0cp01867h1.pdf [file d0cp01867h1.pdf]

## Supporting Information for

### **DFT insight into axial ligand effects on electronic structure and mechanistic reactivity of oxoiron(IV) porphyrin**

Zhifeng Ma<sup>a</sup>, Naoki Nakatani<sup>a</sup>, Hiroshi Fujii<sup>b</sup>, and Masahiko Hada<sup>\*a</sup>,

a) Department of Chemistry, Graduate School of Science, Tokyo Metropolitan University,  
1-1 Minami-Osawa, Hachioji, Tokyo, 192-0397, Japan

b) Department of Chemistry, Graduate School of Humanities and Science, Nara Women's  
University, Kitauoyanishi, Nara, 630-8506, Japan

E-mail addresses:

ma-zhifeng@ed.tmu.ac.jp; naokin@tmu.ac.jp; fujii@cc.nara-wu.ac.jp; hada@tmu.ac.jp

\*Corresponding Author:

E-mail: hada@tmu.ac.jp, Tel: +81-48-858-9113.

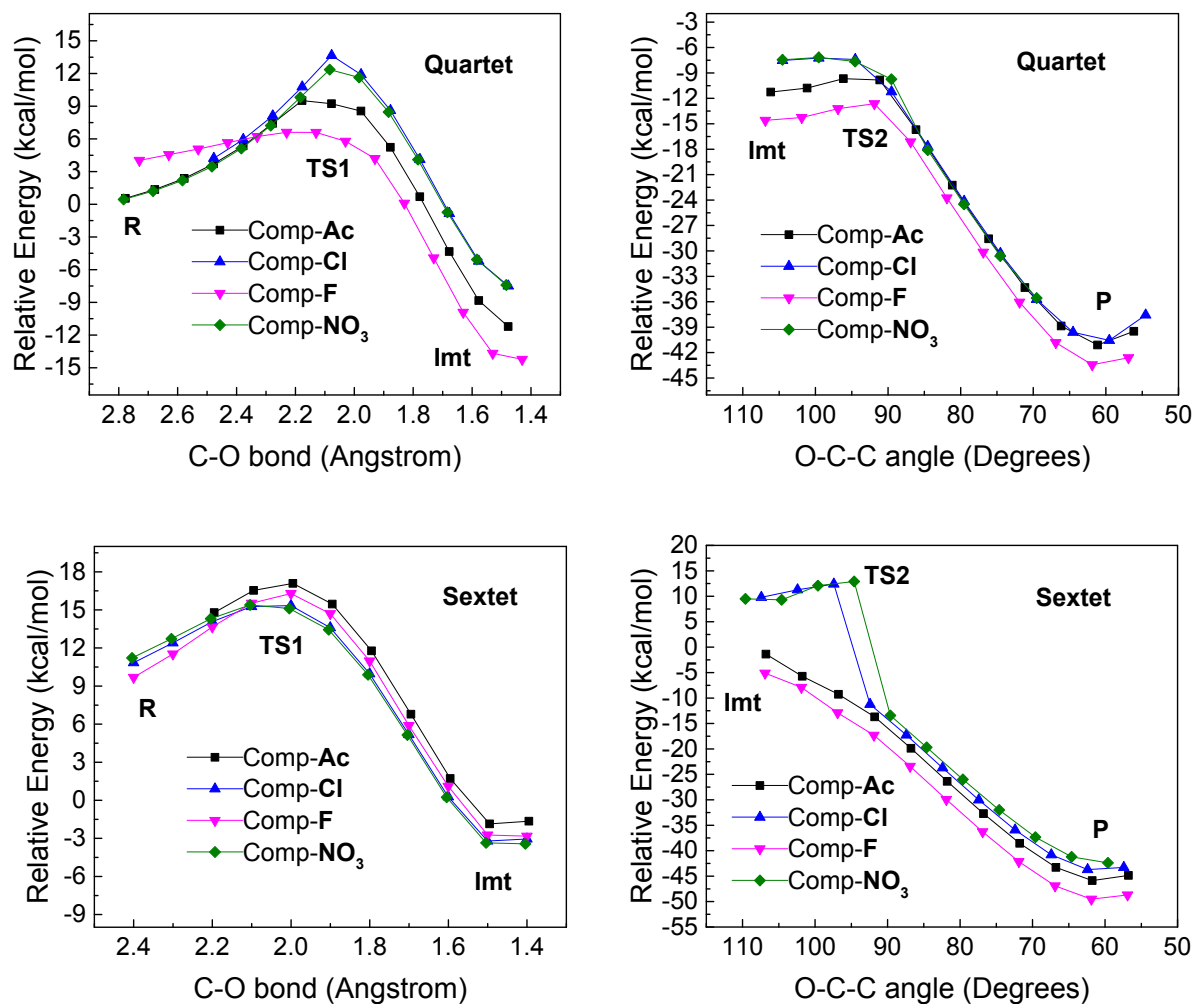

**Figure S1.** Geometry scans for the generation of radical complexes from reactants and epoxide formation scans starting from radical intermediates. Each point is a full geometry optimization.

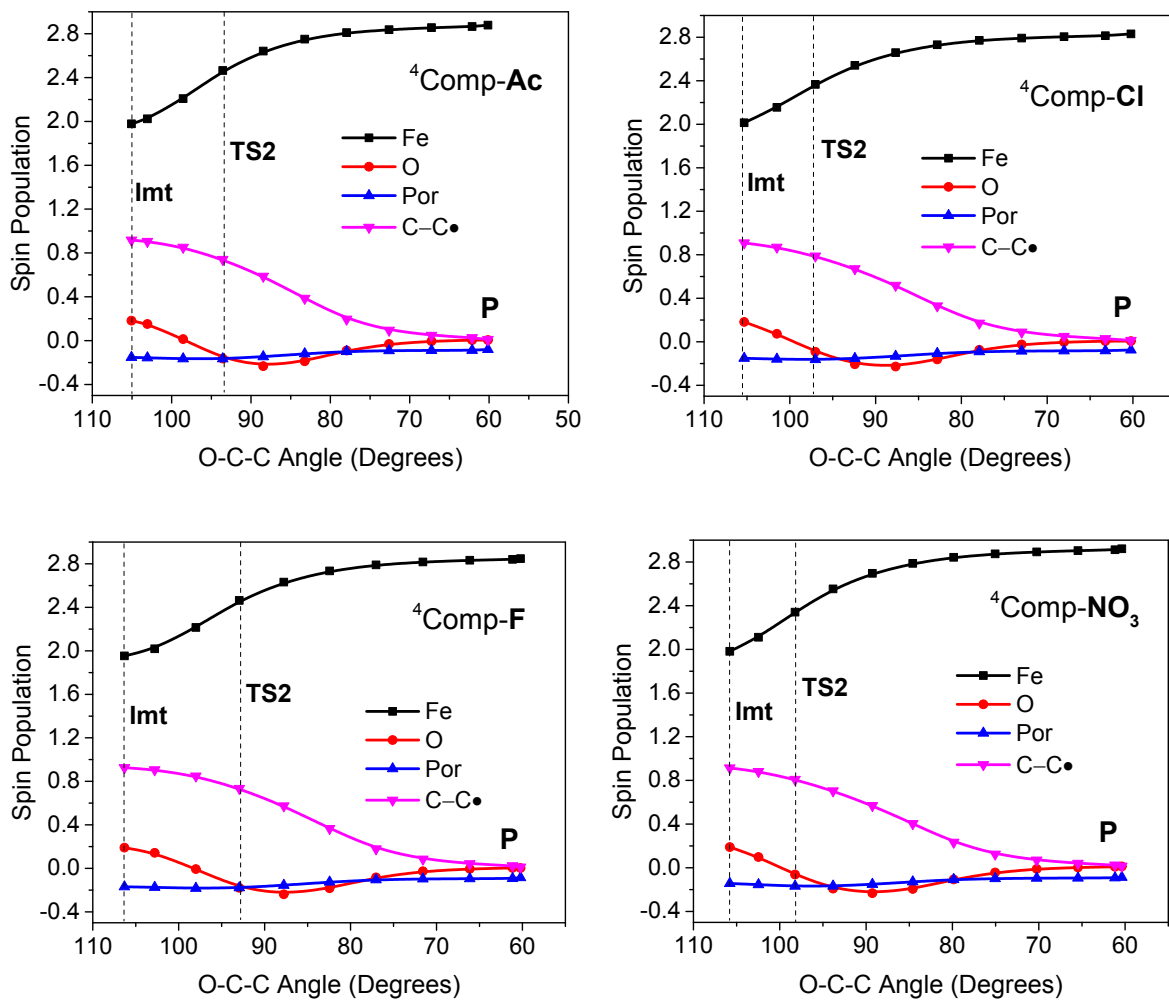

**Figure S2.** Change in spin population along ethylene oxidation by Fe(IV)OL-porphyrin complexes in the quartet ground spin state.

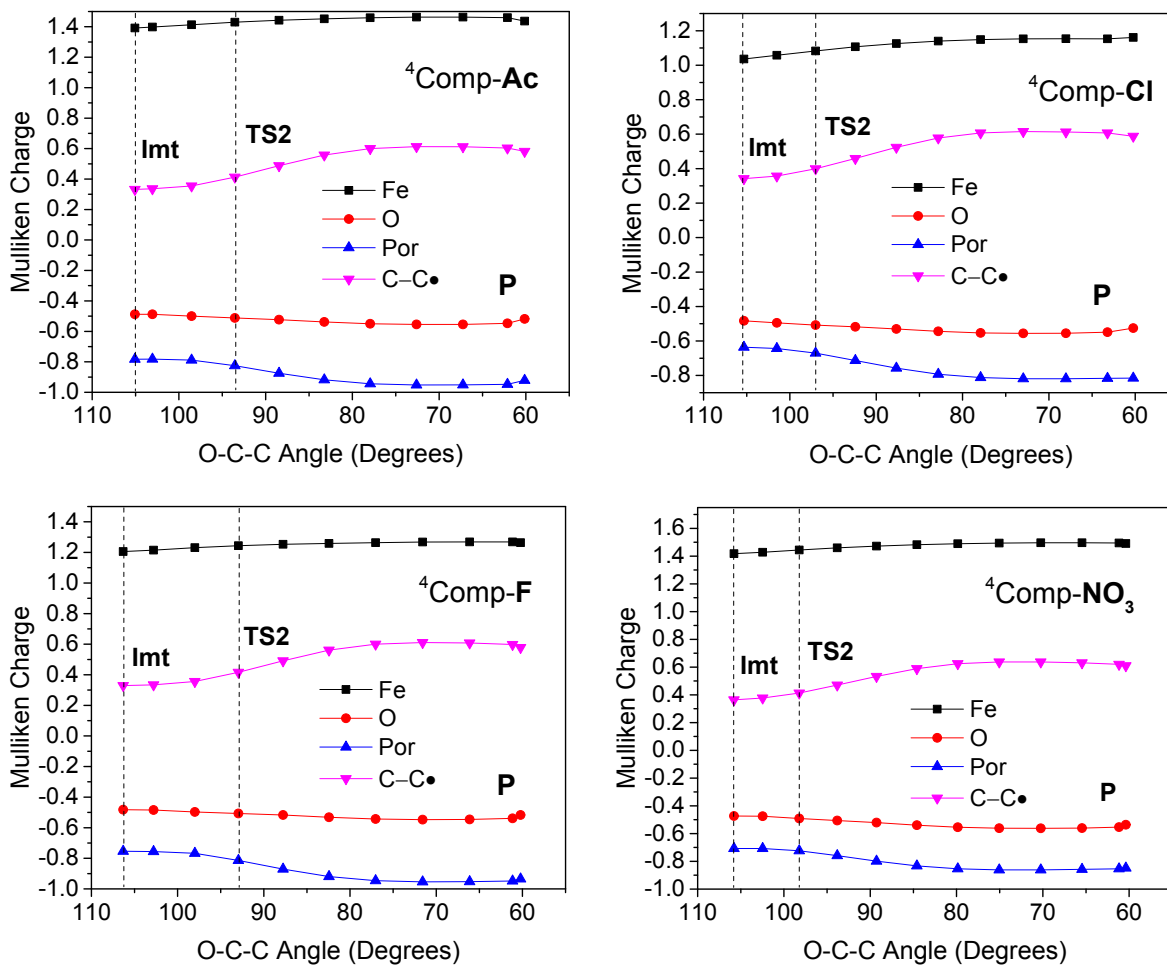

**Figure S3.** Change in Mulliken charge during ethylene oxidation by Fe(IV)OL-porphyrin complexes.

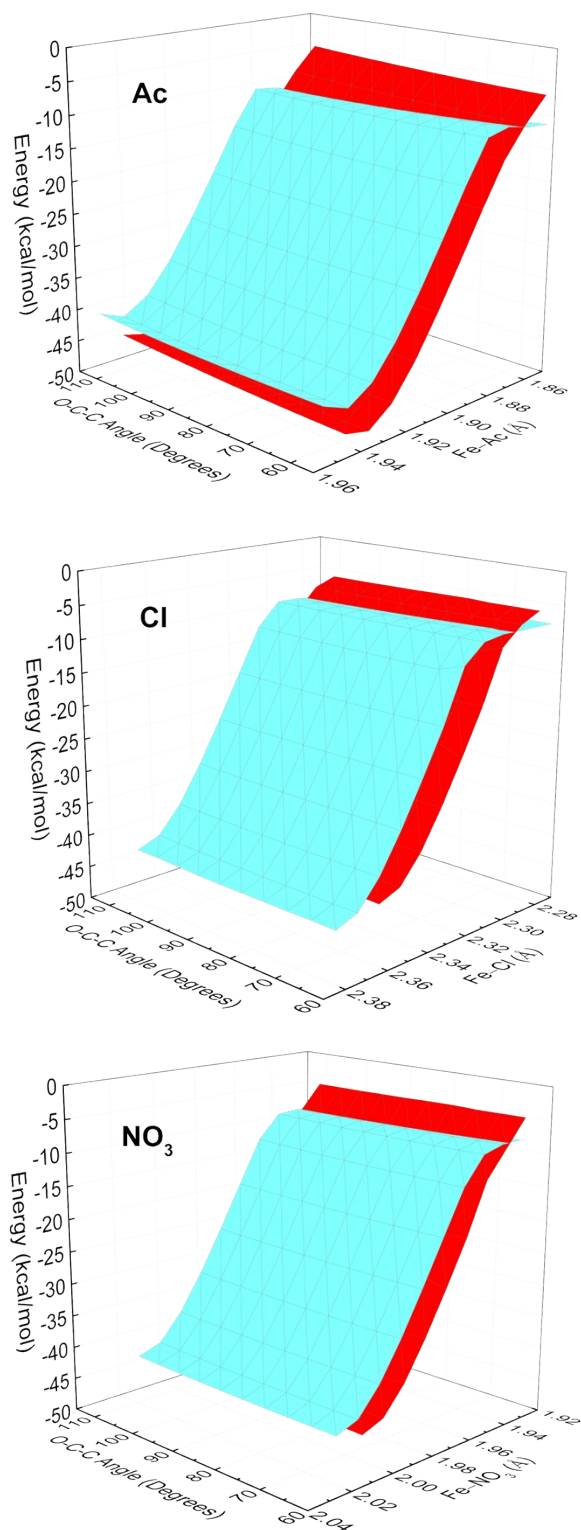

**Figure S4.** 2D potential energy surfaces of the quartet (blue) and sextet (red) spin states of the ring-closing reactions (from **Imt** to **P** through **TS2**) by the Fe(IV)OL-porphyrin complexes with Ac, Cl, and NO<sub>3</sub> as the axial ligands.

**Table S1.** Activation energies (kcal/mol) for optimized Comp-Ac, Comp-Cl, Comp-F and Comp-NO<sub>3</sub> using various basis sets for other atoms, cc-pVTZ for iron atom in combination with PBE0 functional.

|              | Comp-Ac | Comp-Cl | Comp-F | Comp-NO <sub>3</sub> |
|--------------|---------|---------|--------|----------------------|
| 6-31G        | 9.5     | 13.7    | 6.6    | 12.3                 |
| 6-31G(d)     | 12.1    | 14.1    | 9.2    | 14.2                 |
| 6-31+G(d)    | 13.2    | 14.6    | 11.0   | 15.5                 |
| 6-31++G(d,p) | 13.2    | 14.6    | 10.9   | 15.4                 |

**Table S2.** Bond lengths (Å) for optimized Comp-Ac, Comp-Cl, Comp-F and Comp-NO<sub>3</sub> using various basis sets for other atoms, cc-pVTZ for iron atom in combination with PBE0 functional.

| Reactants (R)           |         |         |        |                      |                 |         |        |                      |
|-------------------------|---------|---------|--------|----------------------|-----------------|---------|--------|----------------------|
|                         | Fe-O    |         |        |                      | Fe-L (L=Ligand) |         |        |                      |
|                         | Comp-Ac | Comp-Cl | Comp-F | Comp-NO <sub>3</sub> | Comp-Ac         | Comp-Cl | Comp-F | Comp-NO <sub>3</sub> |
| 6-31G                   | 1.637   | 1.630   | 1.642  | 1.626                | 1.966           | 2.404   | 1.867  | 2.019                |
| 6-31G(d)                | 1.627   | 1.623   | 1.633  | 1.618                | 1.974           | 2.362   | 1.850  | 2.022                |
| 6-31+G(d)               | 1.626   | 1.623   | 1.631  | 1.616                | 1.985           | 2.369   | 1.871  | 2.044                |
| 6-31++G(d,p)            | 1.626   | 1.623   | 1.631  | 1.616                | 1.984           | 2.369   | 1.871  | 2.045                |
| Transition states (TS1) |         |         |        |                      |                 |         |        |                      |
| 6-31G                   | 1.759   | 1.702   | 1.770  | 1.712                | 1.873           | 2.329   | 1.793  | 1.952                |
| 6-31G(d)                | 1.716   | 1.691   | 1.758  | 1.689                | 1.900           | 2.294   | 1.775  | 1.962                |
| 6-31+G(d)               | 1.706   | 1.690   | 1.755  | 1.683                | 1.914           | 2.295   | 1.786  | 1.983                |
| 6-31++G(d,p)            | 1.707   | 1.691   | 1.755  | 1.684                | 1.913           | 2.294   | 1.786  | 1.982                |

**Table S3.** Mulliken spin population ( $P$ ) of key atoms based on optimized structures during the epoxidation of ethylene in the quartet state.

|                                                             | $P_{Fe}$ | $P_{Por}$ | $P_{N \times 4}$ | $P_O$ | $P_L$ | $P_{CH2}$ | $P_{CH2}^a$ |
|-------------------------------------------------------------|----------|-----------|------------------|-------|-------|-----------|-------------|
| <sup>4</sup> Ac+C <sub>2</sub> H <sub>4</sub>               | 1.17     | 0.89      | 0.76             | 0.87  | 0.03  | 0.00      | 0.00        |
| <sup>4</sup> Cl+C <sub>2</sub> H <sub>4</sub>               | 1.16     | 0.88      | 0.76             | 0.87  | 0.09  | 0.00      | 0.00        |
| <sup>4</sup> F+C <sub>2</sub> H <sub>4</sub>                | 1.19     | 0.91      | 0.75             | 0.84  | 0.06  | 0.00      | 0.00        |
| <sup>4</sup> NO <sub>3</sub> +C <sub>2</sub> H <sub>4</sub> | 1.16     | 0.93      | 0.73             | 0.89  | 0.01  | 0.00      | 0.00        |
| <sup>4</sup> Ac-TS1                                         | 1.68     | 0.04      | -0.01            | 0.95  | 0.05  | -0.11     | 0.38        |
| <sup>4</sup> Cl-TS1                                         | 1.47     | 0.28      | 0.25             | 0.81  | 0.11  | -0.13     | 0.45        |
| <sup>4</sup> F-TS1                                          | 1.75     | -0.03     | -0.08            | 0.94  | 0.09  | -0.11     | 0.36        |
| <sup>4</sup> NO <sub>3</sub> -TS1                           | 1.54     | 0.22      | 0.17             | 0.88  | 0.03  | -0.10     | 0.42        |
| <sup>4</sup> Ac-Imt1                                        | 1.95     | -0.15     | -0.19            | 0.20  | 0.05  | -0.04     | 0.97        |
| <sup>4</sup> Cl-Imt1                                        | 2.06     | -0.15     | -0.20            | 0.15  | 0.05  | -0.04     | 0.94        |
| <sup>4</sup> F-Imt1                                         | 1.96     | -0.17     | -0.20            | 0.18  | 0.10  | -0.04     | 0.97        |
| <sup>4</sup> NO <sub>3</sub> -Imt1                          | 2.04     | -0.14     | -0.20            | 0.16  | 0.02  | -0.04     | 0.94        |
| <sup>4</sup> Ac-TS2                                         | 2.46     | -0.16     | -0.24            | -0.16 | 0.10  | -0.04     | 0.77        |
| <sup>4</sup> Cl-TS2                                         | 2.37     | -0.16     | -0.23            | -0.09 | 0.10  | -0.04     | 0.83        |
| <sup>4</sup> F-TS2                                          | 2.46     | -0.18     | -0.24            | -0.18 | 0.16  | -0.04     | 0.77        |
| <sup>4</sup> NO <sub>3</sub> -TS2                           | 2.34     | -0.17     | -0.24            | -0.06 | 0.06  | -0.03     | 0.84        |
| <sup>4</sup> Ac-P                                           | 2.87     | -0.08     | -0.18            | 0.02  | 0.15  | 0.00      | 0.00        |
| <sup>4</sup> Cl-P                                           | 2.82     | -0.07     | -0.18            | 0.02  | 0.22  | 0.00      | 0.00        |
| <sup>4</sup> F-P                                            | 2.84     | -0.08     | -0.17            | 0.02  | 0.22  | 0.00      | 0.00        |

|                                 |      |       |       |      |      |      |      |
|---------------------------------|------|-------|-------|------|------|------|------|
| <sup>4</sup> NO <sub>3</sub> -P | 2.92 | -0.08 | -0.20 | 0.03 | 0.10 | 0.00 | 0.00 |
|---------------------------------|------|-------|-------|------|------|------|------|

<sup>a</sup> Terminal CH<sub>2</sub> group in ethylene

**Table S4.** Mulliken spin population ( $P$ ) of key atoms based on optimized structures during the epoxidation of ethylene in the sextet state.

|                                                             | $P_{\text{Fe}}$ | $P_{\text{Por}}$ | $P_{\text{N}\times 4}$ | $P_{\text{O}}$ | $P_{\text{L}}$ | $P_{\text{CH}_2}$ | $P_{\text{CH}_2^a}$ |
|-------------------------------------------------------------|-----------------|------------------|------------------------|----------------|----------------|-------------------|---------------------|
| <sup>6</sup> Ac+C <sub>2</sub> H <sub>4</sub>               | 3.21            | 1.18             | 1.02                   | 0.59           | 0.01           | 0.00              | 0.00                |
| <sup>6</sup> Cl+C <sub>2</sub> H <sub>4</sub>               | 3.22            | 1.17             | 1.02                   | 0.56           | 0.05           | 0.00              | 0.00                |
| <sup>6</sup> F+C <sub>2</sub> H <sub>4</sub>                | 3.22            | 1.18             | 1.00                   | 0.55           | 0.05           | 0.00              | 0.00                |
| <sup>6</sup> NO <sub>3</sub> +C <sub>2</sub> H <sub>4</sub> | 3.22            | 1.21             | 1.00                   | 0.56           | 0.01           | 0.00              | 0.00                |
| <sup>6</sup> Ac-TS1                                         | 3.98            | 1.20             | 1.02                   | 0.01           | 0.09           | 0.17              | -0.46               |
| <sup>6</sup> Cl-TS1                                         | 3.94            | 1.16             | 1.01                   | 0.03           | 0.17           | 0.16              | -0.48               |
| <sup>6</sup> F-TS1                                          | 3.98            | 1.18             | 1.01                   | -0.04          | 0.14           | 0.17              | -0.44               |
| <sup>6</sup> NO <sub>3</sub> -TS1                           | 3.83            | 1.22             | 0.99                   | 0.09           | 0.05           | 0.15              | -0.34               |
| <sup>6</sup> Ac-Imt1                                        | 4.30            | -0.42            | -0.32                  | 0.15           | 0.11           | -0.05             | 0.89                |
| <sup>6</sup> Cl-Imt1                                        | 2.61            | 0.82             | 0.63                   | 0.42           | 0.20           | -0.06             | 1.00                |
| <sup>6</sup> F-Imt1                                         | 3.75            | 0.30             | 0.23                   | -0.03          | 0.11           | -0.03             | 0.90                |
| <sup>6</sup> NO <sub>3</sub> -Imt1                          | 2.64            | 0.90             | 0.62                   | 0.42           | 0.06           | -0.06             | 1.00                |
| <sup>6</sup> Ac-TS2                                         | 4.31            | -0.34            | -0.26                  | 0.04           | 0.12           | -0.03             | 0.88                |
| <sup>4</sup> Cl-TS2                                         | 4.26            | -0.64            | -0.48                  | 0.31           | 0.07           | 0.00              | 1.00                |
| <sup>6</sup> F-TS2                                          | 4.36            | 0.23             | 0.17                   | -0.62          | 0.23           | -0.09             | 0.88                |
| <sup>6</sup> NO <sub>3</sub> -TS2                           | 4.29            | -0.59            | -0.42                  | 0.27           | 0.05           | -0.01             | 0.97                |
| <sup>6</sup> Ac-P                                           | 4.34            | 0.41             | 0.32                   | 0.02           | 0.18           | 0.00              | 0.00                |
| <sup>6</sup> Cl-P                                           | 4.28            | 0.43             | 0.33                   | 0.03           | 0.25           | 0.00              | 0.00                |
| <sup>6</sup> F-P                                            | 4.34            | 0.40             | 0.31                   | 0.02           | 0.23           | 0.00              | 0.00                |
| <sup>6</sup> NO <sub>3</sub> -P                             | 4.36            | 0.43             | 0.32                   | 0.03           | 0.13           | 0.00              | 0.00                |

<sup>a</sup> Terminal CH<sub>2</sub> group in ethylene

**Table S5.** Absolute energies (Hartree) in the 1-hexene solvent and the group Mulliken charges ( $Q$ ) of optimized structures in the epoxidation in the quartet state.

|                                                             | Energy      | $Q_{\text{Fe}}$ | $Q_{\text{Por}}$ | $Q_{\text{N}\times 4}$ | $Q_{\text{O}}$ | $Q_{\text{X}}$ | $Q_{\text{CH}_2}$ | $Q_{\text{CH}_2^a}$ |
|-------------------------------------------------------------|-------------|-----------------|------------------|------------------------|----------------|----------------|-------------------|---------------------|
| <sup>4</sup> Ac+C <sub>2</sub> H <sub>4</sub>               | -2632.28493 | 1.06            | -0.24            | -2.76                  | -0.27          | -0.58          | 0.0               | 0.0                 |
| <sup>4</sup> Cl+C <sub>2</sub> H <sub>4</sub>               | -2864.17171 | 0.78            | -0.12            | -2.69                  | -0.26          | -0.40          | 0.0               | 0.0                 |
| <sup>4</sup> F+C <sub>2</sub> H <sub>4</sub>                | -2503.87022 | 0.86            | -0.19            | -2.68                  | -0.29          | -0.38          | 0.0               | 0.0                 |
| <sup>4</sup> NO <sub>3</sub> +C <sub>2</sub> H <sub>4</sub> | -2684.02848 | 1.11            | -0.16            | -2.79                  | -0.24          | -0.42          | 0.0               | 0.0                 |
| <sup>4</sup> Ac-TS1                                         | -2632.26976 | 1.24            | -0.68            | -2.95                  | -0.29          | -0.56          | 0.12              | 0.07                |
| <sup>4</sup> Cl-TS1                                         | -2864.14995 | 0.87            | -0.48            | -2.83                  | -0.30          | -0.30          | 0.15              | 0.07                |
| <sup>4</sup> F-TS1                                          | -2503.85971 | 1.07            | -0.66            | -2.91                  | -0.28          | -0.31          | 0.11              | 0.07                |
| <sup>4</sup> NO <sub>3</sub> -TS1                           | -2684.00879 | 1.28            | -0.56            | -2.93                  | -0.28          | -0.41          | 0.14              | 0.08                |
| <sup>4</sup> Ac-Imt1                                        | -2632.30281 | 1.39            | -0.78            | -3.03                  | -0.48          | -0.56          | 0.25              | 0.08                |
| <sup>4</sup> Cl-Imt1                                        | -2864.18366 | 1.04            | -0.63            | -2.96                  | -0.49          | -0.25          | 0.25              | 0.10                |
| <sup>4</sup> F-Imt1                                         | -2503.89290 | 1.21            | -0.75            | -2.98                  | -0.48          | -0.30          | 0.25              | 0.08                |
| <sup>4</sup> NO <sub>3</sub> -Imt1                          | -2684.04028 | 1.15            | -0.71            | -3.06                  | -0.47          | -0.41          | 0.26              | 0.10                |
| <sup>4</sup> Ac-TS2                                         | -2632.30035 | 1.43            | -0.82            | -3.06                  | -0.51          | -0.58          | 0.26              | 0.16                |
| <sup>4</sup> Cl-TS2                                         | -2864.18352 | 1.08            | -0.67            | -2.98                  | -0.51          | -0.30          | 0.25              | 0.17                |
| <sup>4</sup> F-TS2                                          | -2503.89035 | 1.24            | -0.81            | -3.00                  | -0.51          | -0.34          | 0.26              | 0.15                |
| <sup>4</sup> NO <sub>3</sub> -TS2                           | -2684.03990 | 1.44            | -0.72            | -3.08                  | -0.49          | -0.41          | 0.26              | 0.15                |
| <sup>4</sup> Ac-P                                           | -2632.35050 | 1.43            | -0.91            | -3.11                  | -0.50          | -0.62          | 0.29              | 0.29                |
| <sup>4</sup> Cl-P                                           | -2864.23693 | 1.15            | -0.81            | -3.07                  | -0.51          | -0.41          | 0.29              | 0.29                |

|                                 |             |      |       |       |       |       |      |      |
|---------------------------------|-------------|------|-------|-------|-------|-------|------|------|
| <sup>4</sup> F-P                | -2503.93972 | 1.25 | -0.93 | -3.04 | -0.50 | -0.39 | 0.28 | 0.28 |
| <sup>4</sup> NO <sub>3</sub> -P | -2684.09384 | 1.49 | -0.84 | -3.14 | -0.52 | -0.45 | 0.30 | 0.30 |

<sup>a</sup> Terminal CH<sub>2</sub> group in ethylene

**Table S6.** Absolute energies (Hartree) in the 1-hexene solvent and group Mulliken charges (*Q*) of optimized structures in the epoxidation in the sextet state.

|                                                             | Energy      | <i>Q</i> <sub>Fe</sub> | <i>Q</i> <sub>Por</sub> | <i>Q</i> <sub>N×4</sub> | <i>Q</i> <sub>O</sub> | <i>Q</i> <sub>X</sub> | <i>Q</i> <sub>CH<sub>2</sub></sub> | <i>Q</i> <sub>CH<sub>2</sub></sub> <sup>a</sup> |
|-------------------------------------------------------------|-------------|------------------------|-------------------------|-------------------------|-----------------------|-----------------------|------------------------------------|-------------------------------------------------|
| <sup>6</sup> Ac+C <sub>2</sub> H <sub>4</sub>               | -2632.27542 | 1.22                   | -0.39                   | -2.89                   | -0.29                 | -0.58                 | 0.0                                | 0.0                                             |
| <sup>6</sup> Cl+C <sub>2</sub> H <sub>4</sub>               | -2864.16140 | 0.94                   | -0.28                   | -2.82                   | -0.28                 | -0.38                 | 0.00                               | 0.00                                            |
| <sup>6</sup> F+C <sub>2</sub> H <sub>4</sub>                | -2503.86280 | 1.03                   | -0.36                   | -2.83                   | -0.30                 | -0.37                 | 0.00                               | 0.00                                            |
| <sup>6</sup> NO <sub>3</sub> +C <sub>2</sub> H <sub>4</sub> | -2684.01733 | 1.27                   | -0.31                   | -2.92                   | -0.26                 | -0.43                 | 0.00                               | 0.00                                            |
| <sup>6</sup> Ac-TS1                                         | -2632.25771 | 1.36                   | -0.49                   | -2.93                   | -0.43                 | -0.60                 | 0.12                               | 0.04                                            |
| <sup>6</sup> Cl-TS1                                         | -2864.14727 | 1.14                   | -0.42                   | -2.88                   | -0.44                 | -0.47                 | 0.13                               | 0.06                                            |
| <sup>6</sup> F-TS1                                          | -2503.84426 | 1.16                   | -0.47                   | -2.87                   | -0.42                 | -0.40                 | 0.11                               | 0.02                                            |
| <sup>6</sup> NO <sub>3</sub> -TS1                           | -2684.00395 | 1.36                   | -0.40                   | -2.95                   | -0.36                 | -0.43                 | 0.10                               | 0.03                                            |
| <sup>6</sup> Ac-Imt1                                        | -2632.28790 | 1.54                   | -0.68                   | -3.06                   | -0.58                 | -0.61                 | 0.23                               | 0.10                                            |
| <sup>6</sup> Cl-Imt1                                        | -2864.17683 | 1.12                   | -0.27                   | -2.79                   | -0.60                 | -0.48                 | 0.20                               | 0.03                                            |
| <sup>6</sup> F-Imt1                                         | -2503.87473 | 1.39                   | -1.01                   | -3.17                   | -0.47                 | -0.30                 | 0.27                               | 0.13                                            |
| <sup>6</sup> NO <sub>3</sub> -Imt1                          | -2684.03394 | 1.34                   | -0.25                   | -2.87                   | -0.60                 | -0.41                 | 0.21                               | 0.03                                            |
| <sup>6</sup> Ac-TS2                                         | -2632.28711 | 1.54                   | -0.72                   | -3.08                   | -0.58                 | -0.61                 | 0.25                               | 0.10                                            |
| <sup>6</sup> Cl-TS2                                         | -2864.15196 | 1.29                   | -0.45                   | -2.94                   | -0.63                 | -0.48                 | 0.25                               | 0.02                                            |
| <sup>6</sup> F-TS2                                          | -2503.87837 | 1.41                   | -1.04                   | -3.17                   | -0.41                 | -0.38                 | 0.30                               | 0.12                                            |
| <sup>6</sup> NO <sub>3</sub> -TS2                           | -2684.00792 | 1.54                   | -0.50                   | -3.05                   | -0.61                 | -0.42                 | 0.26                               | 0.05                                            |
| <sup>6</sup> Ac-P                                           | -2632.35829 | 1.61                   | -1.14                   | -3.24                   | -0.51                 | -0.63                 | 0.29                               | 0.29                                            |
| <sup>6</sup> Cl-P                                           | -2864.24198 | 1.30                   | -1.04                   | -3.21                   | -0.51                 | -0.34                 | 0.29                               | 0.29                                            |
| <sup>6</sup> F-P                                            | -2503.94950 | 1.46                   | -1.15                   | -3.21                   | -0.51                 | -0.38                 | 0.29                               | 0.29                                            |
| <sup>6</sup> NO <sub>3</sub> -P                             | -2684.09614 | 1.67                   | -1.07                   | -3.28                   | -0.52                 | -0.45                 | 0.30                               | 0.30                                            |

<sup>a</sup> Terminal CH<sub>2</sub> group in ethylene

**Figure S5.** Cartesian coordinates of representative stationary structures and an estimated structure of the minimum energy point as follows.

#### Reactant (<sup>4</sup>R) for Comp-F

|    |             |             |             |
|----|-------------|-------------|-------------|
| Fe | 0.00000000  | 0.00000000  | 0.08294900  |
| O  | 0.00000000  | 0.00000000  | 1.72517300  |
| N  | 1.42315900  | -1.42318600 | 0.01366900  |
| N  | -1.42318600 | -1.42315900 | 0.01366900  |
| N  | -1.42315900 | 1.42318600  | 0.01366900  |
| N  | 1.42318600  | 1.42315900  | 0.01366900  |
| C  | 1.23531100  | -2.78465600 | 0.00455700  |
| C  | 0.00000000  | -3.41677100 | 0.00205500  |
| C  | -1.23531400 | -2.78456800 | 0.00468600  |
| C  | -2.50578900 | -3.46949300 | -0.00800000 |
| C  | -3.46951900 | -2.50580800 | -0.00787000 |
| C  | -2.78465600 | -1.23531100 | 0.00455700  |
| C  | -3.41677100 | 0.00000000  | 0.00205500  |
| C  | -2.78456800 | 1.23531400  | 0.00468600  |



|   |             |             |             |
|---|-------------|-------------|-------------|
| C | -3.46949300 | 2.50578900  | -0.00800000 |
| C | -2.50580800 | 3.46951900  | -0.00787000 |
| C | -1.23531100 | 2.78465600  | 0.00455700  |
| C | 0.00000000  | 3.41677100  | 0.00205500  |
| C | 1.23531400  | 2.78456800  | 0.00468600  |
| C | 2.50578900  | 3.46949300  | -0.00800000 |
| C | 3.46951900  | 2.50580800  | -0.00787000 |
| C | 2.78465600  | 1.23531100  | 0.00455700  |
| C | 3.41677100  | 0.00000000  | 0.00205500  |
| C | 2.78456800  | -1.23531400 | 0.00468600  |
| C | 3.46949300  | -2.50578900 | -0.00800000 |
| C | 2.50580800  | -3.46951900 | -0.00787000 |
| H | -2.62846500 | -4.54223200 | -0.01872900 |
| H | -4.54223200 | 2.62846500  | -0.01872900 |
| H | -2.62853800 | 4.54225200  | -0.01855900 |
| H | 4.54225200  | 2.62853800  | -0.01855900 |
| H | 2.62853800  | -4.54225200 | -0.01855900 |
| H | 2.62846500  | 4.54223200  | -0.01872900 |
| H | 4.54223200  | -2.62846500 | -0.01872900 |
| H | -4.54225200 | -2.62853800 | -0.01855900 |
| F | 0.00000000  | 0.00000000  | -1.78413900 |
| H | 4.50175000  | -0.00006000 | -0.00616500 |
| H | 0.00006000  | 4.50175000  | -0.00616500 |
| H | -0.00006000 | -4.50175000 | -0.00616500 |
| H | -4.50175000 | 0.00006000  | -0.00616500 |

#### Reactant (<sup>4</sup>R) for Comp-Ac

|    |             |             |             |
|----|-------------|-------------|-------------|
| Fe | -0.11718700 | 0.00004700  | -0.40698400 |
| O  | -0.21884900 | 0.00035500  | -2.04059600 |
| N  | 1.30084700  | 1.41395800  | -0.42750600 |
| N  | -1.53536200 | 1.41906200  | -0.24843900 |
| N  | -1.53395300 | -1.42035200 | -0.24874800 |
| N  | 1.30218200  | -1.41248100 | -0.42838200 |
| C  | 1.12176200  | 2.77373300  | -0.30191700 |
| C  | -0.10342200 | 3.40366800  | -0.15070700 |
| C  | -1.34274100 | 2.77523700  | -0.14821800 |
| C  | -2.61051500 | 3.46057800  | -0.08665000 |
| C  | -3.57780400 | 2.50210500  | -0.16317300 |
| C  | -2.89795500 | 1.23307600  | -0.25336100 |
| C  | -3.53083400 | -0.00163500 | -0.28008600 |
| C  | -2.89670400 | -1.23571200 | -0.25278600 |
| C  | -3.57526100 | -2.50536500 | -0.16153600 |
| C  | -2.60699400 | -3.46287500 | -0.08540600 |
| C  | -1.33993000 | -2.77632000 | -0.14804100 |
| C  | -0.10003800 | -3.40356200 | -0.15139200 |
| C  | 1.12446700  | -2.77241600 | -0.30334800 |
| C  | 2.38959100  | -3.45645300 | -0.42576800 |
| C  | 3.33219000  | -2.49912900 | -0.65126400 |
| C  | 2.64710800  | -1.22937400 | -0.64210000 |
| C  | 3.26922300  | 0.00177700  | -0.77622300 |

|   |             |             |             |
|---|-------------|-------------|-------------|
| C | 2.64597200  | 1.23228800  | -0.64094400 |
| C | 3.32987900  | 2.50266600  | -0.64906500 |
| C | 2.38627100  | 3.45900400  | -0.42353800 |
| H | -2.73038900 | 4.53044200  | -0.00302200 |
| H | -4.64748400 | -2.63218100 | -0.14681300 |
| H | -2.72569600 | -4.53284200 | -0.00139000 |
| H | 4.39491900  | -2.62365800 | -0.79511600 |
| H | 2.51643400  | 4.52855600  | -0.35325300 |
| H | 2.52078500  | -4.52591800 | -0.35607300 |
| H | 4.39254800  | 2.62830500  | -0.79237600 |
| H | -4.65016400 | 2.62786200  | -0.14923700 |
| O | -0.13000400 | -0.00069400 | 1.55857500  |
| O | 2.07211700  | 0.00038000  | 2.17968800  |
| C | 0.35956700  | -0.00100700 | 3.87740000  |
| H | -0.26300300 | -0.88311300 | 4.05748500  |
| H | -0.26475100 | 0.87977000  | 4.05785400  |
| H | 1.20660300  | -0.00035500 | 4.56451400  |
| C | 0.84951300  | -0.00028400 | 2.44369900  |
| H | 4.34002100  | 0.00232300  | -0.95018200 |
| H | -0.09234900 | -4.48527000 | -0.06621200 |
| H | -4.61598700 | -0.00216900 | -0.28231400 |
| H | -0.09680600 | 4.48539000  | -0.06556700 |

#### Reactant (<sup>4</sup>R) for Comp-Cl

|    |             |             |            |
|----|-------------|-------------|------------|
| Fe | 0.00000000  | 0.00000000  | 0.21114500 |
| O  | 0.00000000  | 0.00000000  | 1.84088800 |
| N  | 0.72283200  | -1.87196800 | 0.12359800 |
| N  | -1.87196800 | -0.72283200 | 0.12359800 |
| N  | -0.72283200 | 1.87196800  | 0.12359800 |
| N  | 1.87196800  | 0.72283200  | 0.12359800 |
| C  | 0.00000000  | -3.04320200 | 0.11303500 |
| C  | -1.38358700 | -3.12375200 | 0.11000100 |
| C  | -2.25381300 | -2.04520400 | 0.11210800 |
| C  | -3.69148900 | -2.15538900 | 0.09395200 |
| C  | -4.18214700 | -0.88431800 | 0.09468000 |
| C  | -3.04320200 | 0.00000000  | 0.11303500 |
| C  | -3.12375200 | 1.38358700  | 0.11000100 |
| C  | -2.04520400 | 2.25381300  | 0.11210800 |
| C  | -2.15538900 | 3.69148900  | 0.09395200 |
| C  | -0.88431800 | 4.18214700  | 0.09468000 |
| C  | 0.00000000  | 3.04320200  | 0.11303500 |
| C  | 1.38358700  | 3.12375200  | 0.11000100 |
| C  | 2.25381300  | 2.04520400  | 0.11210800 |
| C  | 3.69148900  | 2.15538900  | 0.09395200 |
| C  | 4.18214700  | 0.88431800  | 0.09468000 |
| C  | 3.04320200  | 0.00000000  | 0.11303500 |
| C  | 3.12375200  | -1.38358700 | 0.11000100 |
| C  | 2.04520400  | -2.25381300 | 0.11210800 |
| C  | 2.15538900  | -3.69148900 | 0.09395200 |
| C  | 0.88431800  | -4.18214700 | 0.09468000 |

|    |             |             |             |
|----|-------------|-------------|-------------|
| H  | -4.23677300 | -3.08705900 | 0.07887300  |
| H  | -3.08705900 | 4.23677300  | 0.07887300  |
| H  | -0.56066600 | 5.21207000  | 0.08015800  |
| H  | 5.21207000  | 0.56066600  | 0.08015800  |
| H  | 0.56066600  | -5.21207000 | 0.08015800  |
| H  | 4.23677300  | 3.08705900  | 0.07887300  |
| H  | 3.08705900  | -4.23677300 | 0.07887300  |
| H  | -5.21207000 | -0.56066600 | 0.08015800  |
| H  | 4.11568500  | -1.82289600 | 0.09940300  |
| H  | 1.82289600  | 4.11568500  | 0.09940300  |
| H  | -1.82289600 | -4.11568500 | 0.09940300  |
| H  | -4.11568500 | 1.82289600  | 0.09940300  |
| Cl | 0.00000000  | 0.00000000  | -2.19305700 |

### Reactant (<sup>4</sup>R) for Comp-NO<sub>3</sub>

|    |             |             |             |
|----|-------------|-------------|-------------|
| Fe | -0.11588800 | 0.00382400  | -0.40244600 |
| O  | -0.21486100 | 0.00950100  | -2.02586800 |
| N  | 1.29139200  | 1.42756800  | -0.40614100 |
| N  | -1.54052800 | 1.41407700  | -0.22759500 |
| N  | -1.52525800 | -1.42352500 | -0.23954600 |
| N  | 1.30702500  | -1.40406400 | -0.41385200 |
| C  | 1.10600100  | 2.78615100  | -0.28635300 |
| C  | -0.12314300 | 3.41046400  | -0.13509200 |
| C  | -1.35660200 | 2.77299400  | -0.12789000 |
| C  | -2.62730100 | 3.44974900  | -0.05715000 |
| C  | -3.58895700 | 2.48533100  | -0.12691700 |
| C  | -2.90215100 | 1.22158000  | -0.22317400 |
| C  | -3.53016700 | -0.01555100 | -0.25028200 |
| C  | -2.88892500 | -1.24595100 | -0.23374800 |
| C  | -3.56183900 | -2.51789300 | -0.14684400 |
| C  | -2.58964700 | -3.47210200 | -0.08354500 |
| C  | -1.32645300 | -2.78080300 | -0.14884600 |
| C  | -0.08588100 | -3.40443900 | -0.15774800 |
| C  | 1.13646900  | -2.76560100 | -0.30272000 |
| C  | 2.40448500  | -3.44171600 | -0.42024400 |
| C  | 3.34508500  | -2.47690200 | -0.62686000 |
| C  | 2.65319400  | -1.21255500 | -0.61338500 |
| C  | 3.27102300  | 0.02364400  | -0.73176600 |
| C  | 2.63958200  | 1.25206400  | -0.60764800 |
| C  | 3.31736600  | 2.52422700  | -0.61431700 |
| C  | 2.36633200  | 3.47717100  | -0.40114900 |
| H  | -2.75288500 | 4.51842900  | 0.03083100  |
| H  | -4.63329800 | -2.64832500 | -0.12341000 |
| H  | -2.70339000 | -4.54269600 | -0.00294700 |
| H  | 4.40979300  | -2.59476700 | -0.76071300 |
| H  | 2.49064000  | 4.54737600  | -0.33247200 |
| H  | 2.54072000  | -4.51085500 | -0.35777100 |
| H  | 4.38055900  | 2.65475400  | -0.74841100 |
| H  | -4.66179800 | 2.60372500  | -0.10267600 |
| O  | -0.20365400 | -0.00872700 | 1.61463300  |

|   |             |             |             |
|---|-------------|-------------|-------------|
| N | 0.78920700  | -0.02430400 | 2.50647900  |
| O | 1.98593600  | 0.01281000  | 2.11532600  |
| O | 0.45850300  | -0.07466400 | 3.71644500  |
| H | -0.12304100 | 4.49188900  | -0.04876600 |
| H | 4.34370900  | 0.02983500  | -0.89355800 |
| H | -0.07395600 | -4.48627600 | -0.07787900 |
| H | -4.61505100 | -0.02130400 | -0.24428000 |

**Transition state (<sup>4</sup>TS1) for Comp-F**

|    |             |             |             |
|----|-------------|-------------|-------------|
| Fe | 0.14970100  | 0.00088500  | -0.21691700 |
| O  | 0.15277900  | -0.03282400 | 1.55310500  |
| N  | -0.44106300 | -1.91615200 | -0.30316300 |
| N  | -1.75961900 | 0.58195100  | -0.33022900 |
| N  | 0.73276300  | 1.91703200  | -0.20859900 |
| N  | 2.02343500  | -0.57056300 | -0.01644700 |
| C  | -1.72408100 | -2.38601400 | -0.50700100 |
| C  | -2.85731800 | -1.60529400 | -0.61097400 |
| C  | -2.86603900 | -0.22555100 | -0.51173400 |
| C  | -4.05558000 | 0.58066900  | -0.58553600 |
| C  | -3.66399500 | 1.88240100  | -0.45961000 |
| C  | -2.23204800 | 1.87884800  | -0.31980900 |
| C  | -1.45994900 | 3.02393800  | -0.24858400 |
| C  | -0.08202100 | 3.03338400  | -0.21699600 |
| C  | 0.72230100  | 4.23068100  | -0.19619500 |
| C  | 2.02447600  | 3.83452300  | -0.17228200 |
| C  | 2.02516400  | 2.39180800  | -0.16565200 |
| C  | 3.16134900  | 1.61366100  | -0.06296300 |
| C  | 3.14885100  | 0.23806200  | 0.03386100  |
| C  | 4.32468700  | -0.57079600 | 0.20701100  |
| C  | 3.91617300  | -1.87064600 | 0.26483300  |
| C  | 2.48691200  | -1.87451300 | 0.11419300  |
| C  | 1.72132000  | -3.01858200 | 0.04632500  |
| C  | 0.35676100  | -3.03101800 | -0.17474700 |
| C  | -0.43675600 | -4.22697700 | -0.31254500 |
| C  | -1.72197900 | -3.82835200 | -0.52575200 |
| H  | -5.05205300 | 0.18931700  | -0.72793100 |
| H  | 0.32394400  | 5.23443400  | -0.20195100 |
| H  | 2.91430800  | 4.44595400  | -0.14995500 |
| H  | 4.51883900  | -2.75889900 | 0.38289700  |
| H  | -2.59985800 | -4.43927800 | -0.67552900 |
| H  | 5.32905700  | -0.17939300 | 0.27146600  |
| H  | -0.04442600 | -5.23145500 | -0.25530200 |
| H  | -4.27437300 | 2.77309100  | -0.48129500 |
| F  | 0.21556400  | 0.00853300  | -2.00835800 |
| H  | 2.22826700  | -3.97148900 | 0.14418100  |
| H  | 4.12106600  | 2.11552400  | -0.02465400 |
| H  | -3.80652400 | -2.10634100 | -0.76225900 |
| H  | -1.97329800 | 3.97861700  | -0.25160700 |
| C  | -1.52430800 | -0.62179200 | 2.81291000  |
| H  | -0.78201300 | -0.98146400 | 3.51578300  |

|   |             |             |            |
|---|-------------|-------------|------------|
| H | -1.87205100 | -1.33414400 | 2.07342600 |
| C | -2.13489900 | 0.57852700  | 2.98412900 |
| H | -2.92048200 | 0.91718100  | 2.31645900 |
| H | -1.82767600 | 1.26344900  | 3.76826400 |

**Transition state (<sup>4</sup>TS1) for Comp-Ac**

|    |             |             |             |
|----|-------------|-------------|-------------|
| Fe | -0.02526400 | 0.11839700  | -0.11955400 |
| O  | 0.19358400  | 0.14313300  | -1.86491100 |
| N  | -0.31452200 | -1.85841100 | -0.12755000 |
| N  | 1.93239000  | -0.18608400 | 0.22512900  |
| N  | 0.27839200  | 2.09401400  | -0.03510200 |
| N  | -1.90759900 | 0.42201100  | -0.51580000 |
| C  | 0.59661000  | -2.83927400 | 0.22048800  |
| C  | 1.92225200  | -2.62625700 | 0.54093000  |
| C  | 2.54482300  | -1.38890700 | 0.51061400  |
| C  | 3.95109600  | -1.18242100 | 0.73706000  |
| C  | 4.18603000  | 0.15498000  | 0.58596200  |
| C  | 2.91974600  | 0.77219300  | 0.29031500  |
| C  | 2.72729300  | 2.13929300  | 0.17949000  |
| C  | 1.49507100  | 2.74558100  | 0.06011900  |
| C  | 1.28686900  | 4.17312200  | 0.07299100  |
| C  | -0.05703800 | 4.38106800  | -0.00039200 |
| C  | -0.67878700 | 3.08204800  | -0.08531300 |
| C  | -2.03108200 | 2.86990300  | -0.27844300 |
| C  | -2.58690500 | 1.63102700  | -0.52067400 |
| C  | -3.96348100 | 1.41601000  | -0.87772400 |
| C  | -4.11810700 | 0.08154700  | -1.10910000 |
| C  | -2.84829500 | -0.54428400 | -0.86484500 |
| C  | -2.64115800 | -1.90390800 | -0.88914600 |
| C  | -1.46362000 | -2.51554400 | -0.49615600 |
| C  | -1.28111700 | -3.93969400 | -0.37220900 |
| C  | -0.01354300 | -4.13959700 | 0.08751500  |
| H  | 4.65442000  | -1.96497900 | 0.98114200  |
| H  | 2.07820500  | 4.90516800  | 0.13941300  |
| H  | -0.59356600 | 5.31816700  | -0.01441300 |
| H  | -5.01331800 | -0.44963300 | -1.39597300 |
| H  | 0.48295300  | -5.07350200 | 0.30621800  |
| H  | -4.70416700 | 2.19895800  | -0.94541100 |
| H  | -2.03817100 | -4.67581800 | -0.59800400 |
| H  | 5.11940100  | 0.68862400  | 0.68846800  |
| O  | -0.22442300 | 0.12965200  | 1.74322000  |
| O  | -2.21166700 | -0.93021100 | 2.16800300  |
| C  | -0.83720900 | -0.17960300 | 4.00657300  |
| H  | -0.70094300 | 0.88437900  | 4.22162500  |
| H  | 0.10531700  | -0.68306200 | 4.24303100  |
| H  | -1.63803100 | -0.58383300 | 4.62629900  |
| C  | -1.16776700 | -0.37218600 | 2.54712000  |
| H  | -3.47503800 | -2.53782700 | -1.16714200 |
| H  | -2.68519600 | 3.73353400  | -0.30475800 |
| H  | 3.60022100  | 2.77838800  | 0.24980200  |

|   |            |             |             |
|---|------------|-------------|-------------|
| H | 2.52934300 | -3.49045100 | 0.78552600  |
| C | 2.65133500 | -0.44687600 | -3.00959700 |
| H | 2.82484500 | 0.30239100  | -3.77571500 |
| H | 3.41391100 | -0.55303700 | -2.24487300 |
| C | 1.50389800 | -1.17418500 | -2.97731400 |
| H | 1.35881500 | -1.97039800 | -2.25621100 |
| H | 0.77580700 | -1.11091400 | -3.77745100 |

**Transition state (<sup>4</sup>TS1) for Comp-C1**

|    |             |             |             |
|----|-------------|-------------|-------------|
| Fe | 0.16190600  | 0.01211000  | -0.05502100 |
| O  | 0.03444100  | 0.00607900  | 1.65134200  |
| N  | 2.01212500  | -0.61186800 | 0.10348400  |
| N  | -0.48650400 | -1.89265000 | -0.17778200 |
| N  | -1.75246500 | 0.64465200  | -0.25577100 |
| N  | 0.78426000  | 1.89549100  | -0.04270000 |
| C  | 2.44254300  | -1.92987100 | 0.23566800  |
| C  | 1.64258200  | -3.04728000 | 0.18136500  |
| C  | 0.27263500  | -3.02714700 | -0.04202700 |
| C  | -0.54547500 | -4.20166600 | -0.20738600 |
| C  | -1.81357900 | -3.76678000 | -0.45763800 |
| C  | -1.77592800 | -2.32625200 | -0.43077000 |
| C  | -2.88229600 | -1.51296500 | -0.57915700 |
| C  | -2.86862200 | -0.13128000 | -0.48001800 |
| C  | -4.03986200 | 0.70275100  | -0.57431500 |
| C  | -3.62173100 | 1.99168500  | -0.40680300 |
| C  | -2.19349100 | 1.94539200  | -0.22512400 |
| C  | -1.38220000 | 3.06340600  | -0.10514000 |
| C  | -0.00637500 | 3.03486900  | -0.04270100 |
| C  | 0.82665300  | 4.21161600  | -0.00904300 |
| C  | 2.11924700  | 3.78542100  | -0.00091400 |
| C  | 2.08622400  | 2.34384500  | -0.01246300 |
| C  | 3.20496600  | 1.53457200  | 0.05100900  |
| C  | 3.16209300  | 0.15865900  | 0.13357300  |
| C  | 4.32063900  | -0.68322300 | 0.29364800  |
| C  | 3.87654600  | -1.96725300 | 0.36810400  |
| H  | -0.18170100 | -5.21666500 | -0.14856700 |
| H  | -5.04084600 | 0.33837200  | -0.75227100 |
| H  | -4.21003200 | 2.89712900  | -0.42378600 |
| H  | 3.02287300  | 4.37618300  | 0.01861400  |
| H  | 4.45400400  | -2.87202100 | 0.48633000  |
| H  | 0.45251000  | 5.22461700  | -0.00294400 |
| H  | 5.33601900  | -0.31919700 | 0.34366900  |
| H  | -2.70160100 | -4.35334300 | -0.64094000 |
| Cl | 0.24922200  | 0.01393600  | -2.37238600 |
| C  | -1.53770800 | -0.66438400 | 2.84555200  |
| H  | -0.79151400 | -0.88517600 | 3.60021900  |
| H  | -1.76555100 | -1.46317800 | 2.14935400  |
| C  | -2.35912700 | 0.42102900  | 2.96991900  |
| H  | -3.17795300 | 0.59750400  | 2.28024200  |
| H  | -2.18467600 | 1.17471600  | 3.73122100  |

|   |             |             |             |
|---|-------------|-------------|-------------|
| H | 2.12232800  | -4.01460600 | 0.27948300  |
| H | 4.17709600  | 2.01337800  | 0.07441900  |
| H | -1.86466900 | 4.03452300  | -0.10034400 |
| H | -3.83645100 | -1.99288900 | -0.76697300 |

**Transition state (<sup>4</sup>TS1) for Comp-NO<sub>3</sub>**

|    |             |             |             |
|----|-------------|-------------|-------------|
| Fe | -0.03597100 | 0.14157700  | -0.14386300 |
| O  | 0.18913200  | 0.18824500  | -1.84080600 |
| N  | -0.25030500 | -1.84287400 | -0.13401000 |
| N  | 1.93637900  | -0.09021600 | 0.20844600  |
| N  | 0.18568200  | 2.11102900  | -0.01808000 |
| N  | -1.94153500 | 0.36992500  | -0.45526000 |
| C  | 0.69492800  | -2.78899500 | 0.22760000  |
| C  | 2.00922000  | -2.52219800 | 0.55564500  |
| C  | 2.59101200  | -1.26380900 | 0.51173700  |
| C  | 3.99238700  | -1.00716400 | 0.71644100  |
| C  | 4.18126400  | 0.33344400  | 0.52837400  |
| C  | 2.88996200  | 0.89925400  | 0.23818700  |
| C  | 2.63761000  | 2.25782600  | 0.11916200  |
| C  | 1.37910600  | 2.81358000  | 0.03820100  |
| C  | 1.11221900  | 4.22992700  | 0.08418400  |
| C  | -0.24088200 | 4.38227700  | 0.08022100  |
| C  | -0.81195100 | 3.06090900  | -0.00132600 |
| C  | -2.16190000 | 2.79598500  | -0.14219400 |
| C  | -2.67594700 | 1.54255500  | -0.40303400 |
| C  | -4.05059800 | 1.27871600  | -0.74380700 |
| C  | -4.14835500 | -0.04900200 | -1.02810200 |
| C  | -2.84539300 | -0.62595000 | -0.82702500 |
| C  | -2.57582300 | -1.97131700 | -0.88723000 |
| C  | -1.36781000 | -2.54371200 | -0.50941400 |
| C  | -1.13390100 | -3.95844200 | -0.38459400 |
| C  | 0.13621700  | -4.10995000 | 0.09151800  |
| H  | 4.72373600  | -1.75913300 | 0.97305200  |
| H  | 1.87412900  | 4.99365000  | 0.13131000  |
| H  | -0.81529300 | 5.29595000  | 0.11364000  |
| H  | -5.02335100 | -0.60874000 | -1.32296300 |
| H  | 0.66242200  | -5.02452100 | 0.32149600  |
| H  | -4.82650900 | 2.02917300  | -0.76845800 |
| H  | -1.86047100 | -4.72342100 | -0.61403300 |
| H  | 5.09724700  | 0.89996300  | 0.60780700  |
| O  | -0.11931700 | 0.13954100  | 1.80614800  |
| N  | -1.00764300 | -0.49566600 | 2.59991900  |
| O  | -2.03046500 | -1.02118500 | 2.10039200  |
| O  | -0.73838500 | -0.49895900 | 3.82164300  |
| H  | 2.64505000  | -3.36142100 | 0.81422600  |
| H  | -3.38212300 | -2.63649500 | -1.17396300 |
| H  | -2.85042100 | 3.63253000  | -0.11893500 |
| H  | 3.48450400  | 2.93320400  | 0.16536200  |
| C  | 2.64926200  | -0.48358400 | -2.94898900 |
| H  | 2.90701600  | 0.29155200  | -3.66366700 |

|   |            |             |             |
|---|------------|-------------|-------------|
| H | 3.38798400 | -0.71884800 | -2.19007300 |
| C | 1.42441900 | -1.08823400 | -2.97064600 |
| H | 1.19995200 | -1.92584300 | -2.32032400 |
| H | 0.73532600 | -0.91781900 | -3.78961000 |

### Intermediate (<sup>4</sup>Imt) for Comp-F

|    |             |             |             |
|----|-------------|-------------|-------------|
| Fe | 0.06624300  | 0.00008700  | -0.21170700 |
| O  | 0.02595700  | 0.00121100  | 1.55509800  |
| N  | -1.34374900 | -1.40932500 | -0.28822200 |
| N  | -1.34131800 | 1.41214200  | -0.28820000 |
| N  | 1.48568500  | 1.41182100  | -0.18139400 |
| N  | 1.48310000  | -1.41436800 | -0.18159500 |
| C  | -2.70357800 | -1.21878500 | -0.45347300 |
| C  | -3.34156300 | 0.00323000  | -0.54401300 |
| C  | -2.70146500 | 1.22414000  | -0.45329200 |
| C  | -3.37145700 | 2.49835500  | -0.47581000 |
| C  | -2.41469200 | 3.45694000  | -0.31777400 |
| C  | -1.14877300 | 2.77885000  | -0.21274300 |
| C  | 0.07015800  | 3.41953000  | -0.10256500 |
| C  | 1.29210700  | 2.77643200  | -0.10761700 |
| C  | 2.56524100  | 3.45216700  | -0.07798000 |
| C  | 3.52799800  | 2.49061000  | -0.14589400 |
| C  | 2.85136300  | 1.21856700  | -0.20193400 |
| C  | 3.49464600  | -0.00312700 | -0.23087800 |
| C  | 2.84913000  | -1.22363400 | -0.20210700 |
| C  | 3.52342500  | -2.49696000 | -0.14631600 |
| C  | 2.55901600  | -3.45673500 | -0.07838200 |
| C  | 1.28713900  | -2.77863700 | -0.10798200 |
| C  | 0.06400800  | -3.41944200 | -0.10301400 |
| C  | -1.15372700 | -2.77645500 | -0.21314600 |
| C  | -2.42088800 | -3.45214400 | -0.31842000 |
| C  | -3.37590500 | -2.49172700 | -0.47618100 |
| H  | -4.43713200 | 2.62598000  | -0.59563700 |
| H  | 2.68738500  | 4.52371600  | -0.02228900 |
| H  | 4.60104300  | 2.61231500  | -0.15226300 |
| H  | 2.67922100  | -4.52854100 | -0.02282800 |
| H  | -4.44182700 | -2.61733600 | -0.59610000 |
| H  | 4.59623100  | -2.62067500 | -0.15276900 |
| H  | -2.54532200 | -4.52447300 | -0.28788200 |
| H  | -2.53713500 | 4.52949000  | -0.28691600 |
| F  | 0.12831200  | 0.00010200  | -1.99922500 |
| H  | 0.06021600  | -4.50197100 | -0.04977700 |
| H  | 4.57835000  | -0.00412200 | -0.24617400 |
| H  | -4.41754600 | 0.00414900  | -0.67401000 |
| H  | 0.06834900  | 4.50208600  | -0.04920300 |
| C  | -1.14200700 | -0.00375400 | 2.43725200  |
| H  | -1.73794000 | -0.89845900 | 2.22539200  |
| H  | -1.74724500 | 0.88412800  | 2.22244500  |
| C  | -0.61652300 | 0.00134200  | 3.82126000  |
| H  | -0.31891700 | 0.93366700  | 4.28916000  |



H -0.32046200 -0.92729900 4.29738700

**Intermediate (<sup>4</sup>Imt) for Comp-Ac**

|    |             |             |             |
|----|-------------|-------------|-------------|
| Fe | 0.08832500  | 0.05931700  | -0.10737600 |
| O  | 0.28864200  | -0.00960700 | -1.86429700 |
| N  | -1.10904100 | -1.51841900 | -0.13896600 |
| N  | 1.66282000  | -1.14312900 | 0.15236000  |
| N  | 1.30172600  | 1.65460700  | -0.04284900 |
| N  | -1.47435700 | 1.26676800  | -0.32816700 |
| C  | -0.76972000 | -2.83044300 | 0.14046900  |
| C  | 0.50252100  | -3.29325700 | 0.41783400  |
| C  | 1.63726100  | -2.50393700 | 0.39431500  |
| C  | 2.98055900  | -2.99649000 | 0.55373900  |
| C  | 3.81870300  | -1.93179500 | 0.39449200  |
| C  | 2.99442200  | -0.77425700 | 0.16139100  |
| C  | 3.47754100  | 0.51545300  | 0.04233100  |
| C  | 2.68140100  | 1.64265400  | -0.02185100 |
| C  | 3.18256900  | 2.99455500  | -0.00134200 |
| C  | 2.09913300  | 3.82129000  | 0.01178100  |
| C  | 0.92755500  | 2.98157600  | -0.02657000 |
| C  | -0.36969200 | 3.45219900  | -0.10002200 |
| C  | -1.47787000 | 2.64597400  | -0.27482800 |
| C  | -2.81071600 | 3.14035700  | -0.51431800 |
| C  | -3.60440200 | 2.05618400  | -0.74033600 |
| C  | -2.77103500 | 0.88824000  | -0.61076400 |
| C  | -3.23053700 | -0.40974100 | -0.70102900 |
| C  | -2.45863000 | -1.52309100 | -0.43520600 |
| C  | -2.96985700 | -2.86560300 | -0.35459200 |
| C  | -1.93315600 | -3.66927800 | 0.01865300  |
| H  | 3.23442000  | -4.02724000 | 0.75272500  |
| H  | 4.22978600  | 3.25823900  | 0.01527500  |
| H  | 2.07728700  | 4.90087400  | 0.03289400  |
| H  | -4.66163200 | 2.03072000  | -0.95869100 |
| H  | -1.93764000 | -4.73551800 | 0.19035800  |
| H  | -3.08214700 | 4.18562300  | -0.51956800 |
| H  | -3.99780900 | -3.13912400 | -0.54055000 |
| H  | 4.89742500  | -1.91334200 | 0.44484500  |
| O  | -0.02095000 | 0.16789200  | 1.74901400  |
| O  | -2.22306700 | -0.11041100 | 2.33107800  |
| C  | -0.56529300 | 0.27825300  | 4.04460400  |
| H  | -0.09866700 | 1.26195900  | 4.15467900  |
| H  | 0.19251400  | -0.47135700 | 4.29136700  |
| H  | -1.41042100 | 0.19139500  | 4.72819100  |
| C  | -1.03381600 | 0.08964500  | 2.62276500  |
| H  | -4.27980900 | -0.56236200 | -0.92502700 |
| H  | -0.52269500 | 4.52492900  | -0.07689400 |
| H  | 4.55227700  | 0.65538200  | 0.06106900  |
| H  | 0.62377700  | -4.35117300 | 0.61982200  |
| C  | 0.59445700  | -0.70731400 | -4.09488600 |
| H  | -0.31308200 | -0.53042600 | -4.66219200 |

|   |             |             |             |
|---|-------------|-------------|-------------|
| H | 1.52814100  | -0.32180200 | -4.49029100 |
| C | 0.51739800  | -1.19091600 | -2.69777100 |
| H | 1.44719500  | -1.67228300 | -2.37431600 |
| H | -0.31320200 | -1.89006100 | -2.54807900 |

**Intermediate (<sup>4</sup>Imt) for Comp-Cl**

|    |             |             |             |
|----|-------------|-------------|-------------|
| Fe | -0.06125400 | 0.00001300  | -0.10086100 |
| O  | -0.01270000 | 0.00072600  | 1.67645500  |
| N  | -1.47862800 | 1.40941200  | -0.06462400 |
| N  | 1.34567400  | 1.40957600  | -0.18319100 |
| N  | 1.34771100  | -1.40737000 | -0.18305600 |
| N  | -1.47648400 | -1.41159300 | -0.06480500 |
| C  | -1.28506500 | 2.77528300  | 0.00383000  |
| C  | -0.06403700 | 3.41903200  | -0.00103100 |
| C  | 1.15382400  | 2.77756600  | -0.11231000 |
| C  | 2.41832500  | 3.45509500  | -0.22510400 |
| C  | 3.37484600  | 2.49623800  | -0.38401700 |
| C  | 2.70614800  | 1.22256300  | -0.35453800 |
| C  | 3.34624300  | 0.00260100  | -0.44943500 |
| C  | 2.70795500  | -1.21827400 | -0.35427400 |
| C  | 3.37860200  | -2.49090100 | -0.38351700 |
| C  | 2.42354900  | -3.45123800 | -0.22462000 |
| C  | 1.15798800  | -2.77569000 | -0.11211600 |
| C  | -0.05889800 | -3.41906200 | -0.00115300 |
| C  | -1.28090700 | -2.77718600 | 0.00339400  |
| C  | -2.55187800 | -3.45484900 | 0.03822000  |
| C  | -3.51681300 | -2.49494200 | -0.02126300 |
| C  | -2.84358900 | -1.22209500 | -0.07754300 |
| C  | -3.48987500 | -0.00260500 | -0.10445800 |
| C  | -2.84543400 | 1.21786800  | -0.07715200 |
| C  | -3.52055700 | 2.48967800  | -0.02045200 |
| C  | -2.55704100 | 3.45101500  | 0.03915300  |
| H  | 2.54029100  | 4.52776200  | -0.19815100 |
| H  | 4.44390600  | -2.61664100 | -0.50824900 |
| H  | 2.54718300  | -4.52371200 | -0.19757900 |
| H  | -4.58962000 | -2.61847700 | -0.02168200 |
| H  | -2.67814300 | 4.52274300  | 0.09314500  |
| H  | -2.67137000 | -4.52677600 | 0.09187600  |
| H  | -4.59354900 | 2.61160800  | -0.02064600 |
| H  | 4.43994000  | 2.62361500  | -0.50886800 |
| Cl | -0.14888800 | 0.00005900  | -2.39482400 |
| C  | 1.17024600  | -0.00261800 | 2.54222400  |
| H  | 1.77045500  | 0.88716300  | 2.32484100  |
| H  | 1.76329300  | -0.89785700 | 2.32773100  |
| C  | 0.62754200  | 0.00181400  | 3.91788700  |
| H  | 0.32046100  | -0.92687300 | 4.38659800  |
| H  | 0.32760300  | 0.93443500  | 4.38339900  |
| H  | -0.06230200 | 4.50175300  | 0.04645400  |
| H  | -4.57351000 | -0.00342000 | -0.11618100 |
| H  | -0.05549800 | -4.50177700 | 0.04629000  |

H 4.42119800 0.00336900 -0.58685700

**Intermediate (<sup>4</sup>Imt) for Comp-NO<sub>3</sub>**

|    |             |             |             |
|----|-------------|-------------|-------------|
| Fe | -0.08666400 | 0.05638500  | 0.11003000  |
| O  | -0.29881800 | -0.02276100 | 1.85526200  |
| N  | 0.93316700  | -1.63587700 | 0.09775800  |
| N  | -1.77257900 | -0.95867700 | -0.19530200 |
| N  | -1.11648600 | 1.77013800  | 0.04731000  |
| N  | 1.59465300  | 1.08458400  | 0.32349500  |
| C  | 0.45872300  | -2.90053700 | -0.21008000 |
| C  | -0.85213900 | -3.21746600 | -0.50868400 |
| C  | -1.89342900 | -2.31029800 | -0.46953800 |
| C  | -3.28048500 | -2.65219000 | -0.63518900 |
| C  | -4.00113000 | -1.50965600 | -0.44341200 |
| C  | -3.06004100 | -0.45215900 | -0.18748000 |
| C  | -3.40409400 | 0.87751000  | -0.03873600 |
| C  | -2.49025000 | 1.90973900  | 0.03549400  |
| C  | -2.84122000 | 3.30713700  | 0.02665500  |
| C  | -1.67472300 | 4.01134000  | 0.00787600  |
| C  | -0.60134300 | 3.05056800  | 0.03482900  |
| C  | 0.73807700  | 3.37959900  | 0.10475300  |
| C  | 1.75068700  | 2.45696300  | 0.27884700  |
| C  | 3.12612500  | 2.80050100  | 0.53136500  |
| C  | 3.79404000  | 1.63514700  | 0.76307600  |
| C  | 2.84095700  | 0.56619500  | 0.62121900  |
| C  | 3.15611700  | -0.77449500 | 0.70377700  |
| C  | 2.27109400  | -1.79359200 | 0.41430500  |
| C  | 2.63393000  | -3.18106200 | 0.31575400  |
| C  | 1.52233200  | -3.86072700 | -0.08921200 |
| H  | -3.64242200 | -3.64407900 | -0.86156700 |
| H  | -3.85354100 | 3.68287900  | 0.01601200  |
| H  | -1.53578100 | 5.08196900  | -0.01286300 |
| H  | 4.83992900  | 1.49450000  | 0.99156100  |
| H  | 1.41555100  | -4.91765700 | -0.28314500 |
| H  | 3.51135300  | 3.80921700  | 0.54018300  |
| H  | 3.62255600  | -3.56862200 | 0.51185100  |
| H  | -5.07179500 | -1.37639400 | -0.48879100 |
| O  | -0.03362400 | 0.21016100  | -1.82141000 |
| N  | 1.02201200  | 0.11446600  | -2.66626100 |
| O  | 2.13459300  | -0.26399300 | -2.23919600 |
| O  | 0.78233000  | 0.41726300  | -3.85476700 |
| H  | -1.08591100 | -4.25062300 | -0.73683400 |
| H  | 4.17918700  | -1.04276300 | 0.93953600  |
| H  | 1.00579400  | 4.42934600  | 0.08306900  |
| H  | -4.45738900 | 1.13222900  | -0.05068700 |
| C  | -0.70964400 | -0.69364300 | 4.05211000  |
| H  | 0.19858200  | -0.61877000 | 4.64002800  |
| H  | -1.60358500 | -0.20491500 | 4.42389500  |
| C  | -0.65880200 | -1.19533200 | 2.66295800  |
| H  | -1.62476100 | -1.57556600 | 2.31521300  |

H 0.10559300 -1.96580900 2.51952200

**Transition state (<sup>4</sup>TS2) for Comp-F**

|    |             |             |             |
|----|-------------|-------------|-------------|
| Fe | -0.05855400 | 0.00000300  | -0.25473000 |
| O  | -0.03147900 | 0.00000500  | 1.63313200  |
| N  | 1.35828700  | 1.41332500  | -0.26988600 |
| N  | 1.35888000  | -1.41272500 | -0.26983600 |
| N  | -1.47790400 | -1.41550600 | -0.18636800 |
| N  | -1.47849000 | 1.41492200  | -0.18632600 |
| C  | 2.72265900  | 1.22381000  | -0.39255500 |
| C  | 3.36373200  | 0.00071700  | -0.45821300 |
| C  | 2.72317700  | -1.22264400 | -0.39247900 |
| C  | 3.39430000  | -2.49680400 | -0.41241300 |
| C  | 2.43277000  | -3.45759600 | -0.30019000 |
| C  | 1.16410800  | -2.78026100 | -0.22026100 |
| C  | -0.05766500 | -3.42147800 | -0.13924800 |
| C  | -1.28192500 | -2.78046500 | -0.13559100 |
| C  | -2.55423900 | -3.45859400 | -0.10524000 |
| C  | -3.51896900 | -2.49700000 | -0.14641200 |
| C  | -2.84390400 | -1.22340500 | -0.19161700 |
| C  | -3.48761700 | -0.00070700 | -0.20817100 |
| C  | -2.84441200 | 1.22225600  | -0.19151200 |
| C  | -3.52000100 | 2.49556900  | -0.14617400 |
| C  | -2.55566800 | 3.45756100  | -0.10500000 |
| C  | -1.28307800 | 2.77995900  | -0.13547500 |
| C  | -0.05908500 | 3.42148500  | -0.13920200 |
| C  | 1.16294900  | 2.78078100  | -0.22032300 |
| C  | 2.43132700  | 3.45864300  | -0.30031800 |
| C  | 3.39325300  | 2.49824900  | -0.41255700 |
| H  | 4.46303000  | -2.62391700 | -0.50281600 |
| H  | -2.67549800 | -4.53106700 | -0.06573700 |
| H  | -4.59185800 | -2.62088900 | -0.14396900 |
| H  | -2.67736200 | 4.52998500  | -0.06542400 |
| H  | 4.46193000  | 2.62579900  | -0.50300400 |
| H  | -4.59293900 | 2.61901800  | -0.14365300 |
| H  | 2.55313800  | 4.53166300  | -0.28341400 |
| H  | 2.55502500  | -4.53056600 | -0.28326300 |
| F  | -0.11450400 | -0.00005600 | -2.07454100 |
| H  | -0.05768100 | 4.50501000  | -0.10510100 |
| H  | -4.57158800 | -0.00093600 | -0.21327300 |
| H  | 4.44328100  | 0.00094400  | -0.55613900 |
| H  | -0.05580100 | -4.50500600 | -0.10519500 |
| C  | 1.15448300  | -0.00003500 | 2.48283500  |
| H  | 1.75749900  | 0.89767600  | 2.32660900  |
| H  | 1.75741700  | -0.89780500 | 2.32663400  |
| C  | 0.36003200  | 0.00001100  | 3.72150500  |
| H  | -0.03334900 | -0.93137000 | 4.11254600  |
| H  | -0.03324900 | 0.93143100  | 4.11255600  |

**Transition state (<sup>4</sup>TS2) for Comp-Ac**

|    |             |             |             |
|----|-------------|-------------|-------------|
| Fe | 0.08848000  | 0.05374800  | -0.07872700 |
| O  | 0.30426300  | -0.00569200 | -1.94785500 |
| N  | -1.12249100 | -1.52318600 | -0.17452800 |
| N  | 1.65676700  | -1.17351500 | 0.13317000  |
| N  | 1.32145800  | 1.63765900  | -0.03560200 |
| N  | -1.46191000 | 1.27971200  | -0.33755600 |
| C  | -0.79009600 | -2.84680700 | 0.05370200  |
| C  | 0.48150400  | -3.32654800 | 0.30685500  |
| C  | 1.62095500  | -2.54324300 | 0.32223200  |
| C  | 2.95860700  | -3.04865600 | 0.48814400  |
| C  | 3.80442000  | -1.98227700 | 0.39059800  |
| C  | 2.99036700  | -0.81281400 | 0.18299700  |
| C  | 3.48380400  | 0.47626800  | 0.10353100  |
| C  | 2.70017000  | 1.61186800  | 0.02319900  |
| C  | 3.21550800  | 2.95826900  | 0.04209900  |
| C  | 2.14124500  | 3.79694600  | 0.01001100  |
| C  | 0.96205200  | 2.96958400  | -0.04762800 |
| C  | -0.32875300 | 3.45400900  | -0.14714000 |
| C  | -1.44828800 | 2.65981600  | -0.30763700 |
| C  | -2.77831900 | 3.16754600  | -0.53413300 |
| C  | -3.59035300 | 2.08930700  | -0.72170800 |
| C  | -2.76833100 | 0.91340200  | -0.58899000 |
| C  | -3.24381500 | -0.38030000 | -0.66770200 |
| C  | -2.47845800 | -1.50698400 | -0.44030200 |
| C  | -3.00097900 | -2.84714200 | -0.39198100 |
| C  | -1.96273400 | -3.67241000 | -0.07350800 |
| H  | 3.20423700  | -4.08744400 | 0.65312200  |
| H  | 4.26461200  | 3.21141900  | 0.08578000  |
| H  | 2.13139000  | 4.87693800  | 0.01575900  |
| H  | -4.65216300 | 2.07368400  | -0.91793500 |
| H  | -1.97355600 | -4.74384400 | 0.06214400  |
| H  | -3.03729100 | 4.21585900  | -0.55341700 |
| H  | -4.03559000 | -3.10578200 | -0.56215400 |
| H  | 4.88187200  | -1.97165200 | 0.46541900  |
| O  | -0.04046800 | 0.15596600  | 1.82174800  |
| O  | -2.23672100 | -0.11048200 | 2.41139800  |
| C  | -0.57951400 | 0.26675500  | 4.12580800  |
| H  | -0.11503500 | 1.25113100  | 4.24135300  |
| H  | 0.17953800  | -0.48190500 | 4.37236900  |
| H  | -1.42590400 | 0.17601600  | 4.80769900  |
| C  | -1.04148600 | 0.08318200  | 2.69910500  |
| H  | -4.30028400 | -0.51933200 | -0.86588400 |
| H  | -0.46817800 | 4.52896000  | -0.14184200 |
| H  | 4.55880200  | 0.60756000  | 0.15296900  |
| H  | 0.59677200  | -4.39180100 | 0.47071200  |
| C  | 0.54933600  | -0.46433500 | -4.01972300 |
| H  | -0.38700600 | -0.21807300 | -4.50750400 |
| H  | 1.45128800  | 0.03860100  | -4.34968200 |
| C  | 0.54225400  | -1.20370300 | -2.74706800 |
| H  | 1.49460800  | -1.67155000 | -2.48577200 |

H -0.27655500 -1.91964700 -2.64152700

**Transition state (<sup>4</sup>TS2) for Comp-Cl**

Fe -0.05727700 0.00000000 -0.12039600  
O -0.01583800 -0.00000800 1.72491200  
N -1.47363300 1.41137500 -0.06593000  
N 1.35519500 1.40921600 -0.17021000  
N 1.35505600 -1.40935900 -0.17021500  
N -1.47377400 -1.41123600 -0.06592400  
C -1.27887000 2.77756200 -0.01010000  
C -0.05668000 3.42008800 -0.01908600  
C 1.16248300 2.77787000 -0.11369600  
C 2.42866200 3.45465000 -0.21243400  
C 3.38795900 2.49435300 -0.34553700  
C 2.71843500 1.22098300 -0.31740500  
C 3.35899700 -0.00017100 -0.39820400  
C 2.71831300 -1.22126300 -0.31741500  
C 3.38771000 -2.49469900 -0.34555400  
C 2.42831800 -3.45490100 -0.21244900  
C 1.16220700 -2.77799400 -0.11370200  
C -0.05702000 -3.42008800 -0.01907900  
C -1.27914600 -2.77744200 -0.01008000  
C -2.55051700 -3.45449500 0.02413900  
C -3.51515000 -2.49313600 -0.02145100  
C -2.84097600 -1.22060700 -0.07128000  
C -3.48581000 0.00016900 -0.09212100  
C -2.84085500 1.22088200 -0.07129700  
C -3.51490200 2.49347900 -0.02149200  
C -2.55017500 3.45474200 0.02409600  
H 2.55052900 4.52754300 -0.19378100  
H 4.45466600 -2.62160000 -0.45427000  
H 2.55007800 -4.52780600 -0.19379800  
H -4.58802800 -2.61628200 -0.01816600  
H -2.67064000 4.52702300 0.06843200  
H -2.67108800 -4.52676300 0.06849000  
H -4.58776800 2.61673100 -0.01821900  
H 4.45492800 2.62114600 -0.45424800  
Cl -0.13973000 0.00000800 -2.44623500  
C 1.17664100 0.00003300 2.57034100  
H 1.77609900 0.89621500 2.38885800  
H 1.77618000 -0.89609000 2.38883000  
C 0.47743900 -0.00002400 3.86818800  
H 0.11377700 -0.93111100 4.28848200  
H 0.11366600 0.93101000 4.28850000  
H -0.05474500 4.50332900 0.01733600  
H -4.56956200 0.00022300 -0.09937300  
H -0.05519300 -4.50333000 0.01734700  
H 4.43615400 -0.00022400 -0.51777600

**Transition state (<sup>4</sup>TS2) for Comp-NO<sub>3</sub>**

|    |             |             |             |
|----|-------------|-------------|-------------|
| Fe | -0.09937300 | 0.06394800  | 0.07117600  |
| O  | -0.39590400 | 0.07188000  | 1.86119300  |
| N  | -0.01604300 | -1.92159400 | 0.05845700  |
| N  | -2.05043300 | -0.01057700 | -0.30584300 |
| N  | -0.17777600 | 2.06459100  | 0.07231900  |
| N  | 1.87079500  | 0.14436700  | 0.34954900  |
| C  | -1.03719900 | -2.79604000 | -0.27357600 |
| C  | -2.33144200 | -2.43815500 | -0.59589400 |
| C  | -2.80281200 | -1.13950100 | -0.58591500 |
| C  | -4.17473300 | -0.76950400 | -0.80480300 |
| C  | -4.25738700 | 0.58265400  | -0.64023400 |
| C  | -2.93295800 | 1.05566300  | -0.34069400 |
| C  | -2.60134600 | 2.38577000  | -0.16975700 |
| C  | -1.31163100 | 2.84924100  | -0.00228000 |
| C  | -0.94955700 | 4.24288100  | 0.05284500  |
| C  | 0.40908400  | 4.29823300  | 0.14043800  |
| C  | 0.88624000  | 2.93879500  | 0.16066700  |
| C  | 2.21354300  | 2.58148400  | 0.29185000  |
| C  | 2.65958000  | 1.28055800  | 0.41029000  |
| C  | 4.02191800  | 0.91597000  | 0.69282800  |
| C  | 4.05366700  | -0.43953500 | 0.83744400  |
| C  | 2.71529400  | -0.91935900 | 0.62233300  |
| C  | 2.35011600  | -2.25003300 | 0.64657900  |
| C  | 1.08338800  | -2.71040500 | 0.34685300  |
| C  | 0.73584800  | -4.09986500 | 0.21698900  |
| C  | -0.56785200 | -4.15247000 | -0.17985900 |
| H  | -4.96404200 | -1.46573800 | -1.04650400 |
| H  | -1.65445100 | 5.05988000  | 0.01083700  |
| H  | 1.04490800  | 5.16955600  | 0.19029300  |
| H  | 4.90105800  | -1.07175200 | 1.05680800  |
| H  | -1.17000400 | -5.02300000 | -0.39332500 |
| H  | 4.83689100  | 1.61948800  | 0.77559900  |
| H  | 1.41939700  | -4.91828200 | 0.38710700  |
| H  | -5.12706700 | 1.21703000  | -0.72620300 |
| O  | 0.13096100  | 0.12622000  | -1.87577700 |
| N  | 1.32079400  | -0.14733700 | -2.47292500 |
| O  | 1.66457300  | -1.34421100 | -2.58300700 |
| O  | 1.97813300  | 0.82186700  | -2.90686300 |
| H  | -3.03110200 | -3.22956000 | -0.83804600 |
| H  | 3.11907900  | -2.98360300 | 0.85806000  |
| H  | 2.94936300  | 3.37489700  | 0.34724700  |
| H  | -3.40013700 | 3.11642200  | -0.22207600 |
| C  | -1.05896800 | -0.27790900 | 3.95317800  |
| H  | -0.19051200 | -0.56485700 | 4.53569200  |
| H  | -1.63304700 | 0.58385200  | 4.27506300  |
| C  | -1.26409800 | -0.84284900 | 2.60705900  |
| H  | -2.29292400 | -0.76175600 | 2.24538200  |
| H  | -0.90935400 | -1.87118800 | 2.50019400  |

**Product (<sup>4</sup>P) for Comp-F**

|    |             |             |             |
|----|-------------|-------------|-------------|
| Fe | 0.08139200  | -0.00223000 | -0.36943800 |
| O  | 0.07977300  | -0.01175300 | 2.03676800  |
| N  | -0.00656800 | -2.00309500 | -0.19801300 |
| N  | -1.93078000 | 0.07452600  | -0.27960600 |
| N  | 0.14582700  | 1.99988500  | -0.19511100 |
| N  | 2.07130500  | -0.07808500 | -0.13072300 |
| C  | -1.13950400 | -2.79389100 | -0.25363100 |
| C  | -2.44214100 | -2.33265800 | -0.32368600 |
| C  | -2.80463000 | -0.99736500 | -0.34302200 |
| C  | -4.16181800 | -0.52296500 | -0.42707400 |
| C  | -4.10992000 | 0.84039900  | -0.42511700 |
| C  | -2.72059600 | 1.20997600  | -0.34023500 |
| C  | -2.25788300 | 2.51385700  | -0.31782800 |
| C  | -0.92384000 | 2.87460700  | -0.24861700 |
| C  | -0.45016900 | 4.23534200  | -0.21915500 |
| C  | 0.91103200  | 4.18242900  | -0.15444800 |
| C  | 1.27909000  | 2.78930800  | -0.14455200 |
| C  | 2.58141000  | 2.32693200  | -0.09489700 |
| C  | 2.94268900  | 0.99211800  | -0.08783700 |
| C  | 4.30301000  | 0.51898600  | -0.01943200 |
| C  | 4.25113500  | -0.84309400 | -0.01945200 |
| C  | 2.85878600  | -1.21136400 | -0.08782900 |
| C  | 2.39700300  | -2.51463700 | -0.09576800 |
| C  | 1.06324800  | -2.87649500 | -0.14669000 |
| C  | 0.59030500  | -4.23761600 | -0.15868900 |
| C  | -0.77085000 | -4.18673400 | -0.22532800 |
| H  | -5.03161500 | -1.16058500 | -0.48697800 |
| H  | -1.08706800 | 5.10714900  | -0.25019000 |
| H  | 1.61347600  | 5.00224600  | -0.12154400 |
| H  | 5.06986700  | -1.54625800 | 0.02257500  |
| H  | -1.47225000 | -5.00748900 | -0.25828300 |
| H  | 5.17286900  | 1.15779200  | 0.02258300  |
| H  | 1.22822900  | -5.10856600 | -0.12591100 |
| H  | -4.92872000 | 1.54249800  | -0.48307300 |
| F  | 0.14499200  | -0.00283600 | -2.22559200 |
| H  | 3.13331200  | -3.30974700 | -0.06113300 |
| H  | 3.37596900  | 3.06383100  | -0.06027200 |
| H  | -3.23514900 | -3.07033500 | -0.37510000 |
| H  | -2.99281100 | 3.30956600  | -0.36690000 |
| C  | -0.94208500 | -0.70954100 | 2.86345800  |
| H  | -0.52395000 | -1.26715600 | 3.69362400  |
| H  | -1.70797100 | -1.21320700 | 2.28515400  |
| C  | -0.88635700 | 0.76269300  | 2.86248000  |
| H  | -1.61323600 | 1.31865700  | 2.28211000  |
| H  | -0.42622500 | 1.28478100  | 3.69318200  |

**Product (<sup>4</sup>P) for Comp-Ac**

|    |            |             |             |
|----|------------|-------------|-------------|
| Fe | 0.12729100 | 0.05085100  | 0.01784200  |
| O  | 0.38003900 | -0.00797000 | -2.35635000 |



|   |             |             |             |
|---|-------------|-------------|-------------|
| N | -1.20160900 | -1.44248300 | -0.17632900 |
| N | 1.61511800  | -1.30193000 | 0.02931500  |
| N | 1.48492700  | 1.52335100  | -0.10566300 |
| N | -1.33126500 | 1.37850800  | -0.33317300 |
| C | -0.95377200 | -2.79864200 | -0.03704300 |
| C | 0.29495200  | -3.37819400 | 0.09737400  |
| C | 1.48751900  | -2.67712700 | 0.11763600  |
| C | 2.78736100  | -3.28731800 | 0.22487400  |
| C | 3.70494600  | -2.27799500 | 0.20479700  |
| C | 2.97245200  | -1.04355600 | 0.09031100  |
| C | 3.55683200  | 0.20916200  | 0.06121800  |
| C | 2.85882100  | 1.39915600  | -0.02661400 |
| C | 3.47426800  | 2.70182400  | -0.04920300 |
| C | 2.46759700  | 3.61704000  | -0.13962900 |
| C | 1.23048500  | 2.87954600  | -0.17846500 |
| C | -0.01931900 | 3.45955900  | -0.29410300 |
| C | -1.20652300 | 2.75565400  | -0.37273300 |
| C | -2.50331900 | 3.36448500  | -0.52034400 |
| C | -3.41604100 | 2.35249000  | -0.56898200 |
| C | -2.68500500 | 1.11831900  | -0.44473700 |
| C | -3.26906100 | -0.13395400 | -0.43438200 |
| C | -2.57572300 | -1.32073300 | -0.29136600 |
| C | -3.19217200 | -2.61988700 | -0.24013700 |
| C | -2.19122100 | -3.53260800 | -0.07868100 |
| H | 2.96062300  | -4.35031200 | 0.30650300  |
| H | 4.53883000  | 2.87741700  | -0.00022100 |
| H | 2.54045900  | 4.69384000  | -0.18073000 |
| H | -4.48936500 | 2.42081100  | -0.66735100 |
| H | -2.26996300 | -4.60618300 | 0.01003300  |
| H | -2.67771400 | 4.42901300  | -0.57434800 |
| H | -4.25566800 | -2.79578300 | -0.30663500 |
| H | 4.78096600  | -2.34817500 | 0.26716100  |
| O | 0.04234000  | 0.15043600  | 1.96566700  |
| O | -2.13557900 | 0.05569100  | 2.64256500  |
| C | -0.39376000 | 0.24917600  | 4.30081800  |
| H | 0.17129200  | 1.17926600  | 4.41997800  |
| H | 0.29441200  | -0.57653500 | 4.50833400  |
| H | -1.22150400 | 0.22730900  | 5.01080400  |
| C | -0.91303500 | 0.14200200  | 2.88482700  |
| H | -4.34869600 | -0.18741200 | -0.51549700 |
| H | -0.07112600 | 4.54165100  | -0.33622700 |
| H | 4.63816100  | 0.26205000  | 0.11963100  |
| H | 0.34256600  | -4.45740700 | 0.18994000  |
| C | -0.73083700 | -0.23868200 | -3.32070200 |
| H | -1.69384100 | -0.40071200 | -2.85077200 |
| H | -0.71584200 | 0.43662200  | -4.16823900 |
| C | 0.32504900  | -1.25357200 | -3.17010400 |
| H | 1.11650400  | -1.32471500 | -3.90698800 |
| H | 0.12279300  | -2.14711700 | -2.59116600 |

**Product (<sup>4</sup>P) for Comp-CI**

|    |             |             |             |
|----|-------------|-------------|-------------|
| Fe | -0.07632800 | 0.00042600  | -0.23153400 |
| O  | -0.06074300 | 0.00153100  | 2.13045200  |
| N  | -2.06319600 | 0.01589200  | -0.00516200 |
| N  | -0.05031800 | 1.99780100  | -0.07497600 |
| N  | 1.93187900  | -0.01505000 | -0.16548700 |
| N  | -0.08127000 | -1.99689900 | -0.07418300 |
| C  | -2.88714100 | 1.12511700  | 0.03984000  |
| C  | -2.46778900 | 2.44144800  | 0.02906200  |
| C  | -1.14619800 | 2.84111300  | -0.02445800 |
| C  | -0.71468900 | 4.21420800  | -0.04349800 |
| C  | 0.64720400  | 4.20435100  | -0.11443000 |
| C  | 1.05806700  | 2.82487300  | -0.13846100 |
| C  | 2.37324800  | 2.40597200  | -0.21747500 |
| C  | 2.77415800  | 1.08287500  | -0.23797900 |
| C  | 4.14263100  | 0.64984500  | -0.33713500 |
| C  | 4.13208000  | -0.71444400 | -0.33537100 |
| C  | 2.75706000  | -1.12599700 | -0.23534700 |
| C  | 2.33580000  | -2.44272200 | -0.21305300 |
| C  | 1.01421700  | -2.84120000 | -0.13551600 |
| C  | 0.58181000  | -4.21409600 | -0.11194600 |
| C  | -0.78020700 | -4.20266200 | -0.04378200 |
| C  | -1.19025500 | -2.82300400 | -0.02560800 |
| C  | -2.50557000 | -2.40299800 | 0.02663600  |
| C  | -2.90445300 | -1.08032300 | 0.03834900  |
| C  | -4.27663100 | -0.64839800 | 0.10897400  |
| C  | -4.26592000 | 0.71468300  | 0.11000700  |
| H  | -1.37892700 | 5.06522200  | -0.01300600 |
| H  | 4.99154000  | 1.31383900  | -0.40751700 |
| H  | 4.97059800  | -1.39170300 | -0.40403500 |
| H  | -1.45776600 | -5.04316100 | -0.01452400 |
| H  | -5.10517300 | 1.39297200  | 0.15338500  |
| H  | 1.24481600  | -5.06579100 | -0.15039500 |
| H  | -5.12645700 | -1.31344000 | 0.15137600  |
| H  | 1.32340800  | 5.04554800  | -0.15433000 |
| Cl | -0.14113100 | -0.00014300 | -2.60700900 |
| C  | 0.93359200  | 0.73072700  | 2.96643600  |
| H  | 0.48803300  | 1.27617300  | 3.78996500  |
| H  | 1.68839500  | 1.25531400  | 2.39240200  |
| C  | 0.92264300  | -0.74149200 | 2.96706900  |
| H  | 1.66965900  | -1.27760900 | 2.39350000  |
| H  | 0.46907800  | -1.27942100 | 3.79117200  |
| H  | -3.22772500 | 3.21371900  | 0.06250200  |
| H  | -3.27734200 | -3.16348800 | 0.05888200  |
| H  | 3.09341500  | -3.21588900 | -0.27138800 |
| H  | 3.14254500  | 3.16735700  | -0.27779800 |

**Product (<sup>4</sup>P) for Comp-NO<sub>3</sub>**

|    |            |             |             |
|----|------------|-------------|-------------|
| Fe | 0.12220900 | 0.04852400  | -0.00320200 |
| O  | 0.42415600 | -0.06842300 | -2.28677300 |

|   |             |             |             |
|---|-------------|-------------|-------------|
| N | -0.50868000 | -1.85175600 | -0.03667300 |
| N | 2.00967000  | -0.59162900 | 0.15698500  |
| N | 0.78260500  | 1.92827400  | -0.20441500 |
| N | -1.73766100 | 0.66655700  | -0.37124300 |
| C | 0.24925100  | -2.98495400 | 0.21875000  |
| C | 1.61826800  | -3.00999400 | 0.40771000  |
| C | 2.43357600  | -1.89390800 | 0.36708000  |
| C | 3.86317900  | -1.92829000 | 0.51959100  |
| C | 4.30926300  | -0.64419500 | 0.40124200  |
| C | 3.15519700  | 0.18585300  | 0.18324100  |
| C | 3.20126100  | 1.55959300  | 0.04076000  |
| C | 2.09208300  | 2.36509000  | -0.12948900 |
| C | 2.14096400  | 3.80036200  | -0.23642000 |
| C | 0.85544200  | 4.23501700  | -0.36559000 |
| C | 0.01259600  | 3.06768600  | -0.34684400 |
| C | -1.36310600 | 3.09852000  | -0.47186500 |
| C | -2.17082000 | 1.97777900  | -0.49391700 |
| C | -3.59676500 | 2.01038700  | -0.67526800 |
| C | -4.03121900 | 0.71715300  | -0.67069600 |
| C | -2.87644500 | -0.11653900 | -0.47535900 |
| C | -2.91773500 | -1.49492300 | -0.39252000 |
| C | -1.81517800 | -2.29557400 | -0.16437900 |
| C | -1.86850700 | -3.72399300 | -0.00808000 |
| C | -0.59504100 | -4.14909000 | 0.23503800  |
| H | 4.43870900  | -2.82481000 | 0.69649500  |
| H | 3.04794700  | 4.38563100  | -0.20554500 |
| H | 0.49549100  | 5.24840900  | -0.46329500 |
| H | -5.04078400 | 0.34851400  | -0.77544500 |
| H | -0.24678300 | -5.15525000 | 0.41593800  |
| H | -4.17846800 | 2.91319500  | -0.78775500 |
| H | -2.77271600 | -4.31187700 | -0.06311000 |
| H | 5.32328500  | -0.27788800 | 0.46305300  |
| O | 0.04382000  | 0.28846800  | 2.01427300  |
| N | -1.05006900 | 0.32571600  | 2.78317300  |
| O | -1.99557600 | -0.46759300 | 2.53547400  |
| O | -1.06315100 | 1.14815300  | 3.72961400  |
| H | 2.08514700  | -3.97007700 | 0.59540100  |
| H | -3.88452000 | -1.97754800 | -0.47691200 |
| H | -1.84048900 | 4.06647700  | -0.57103200 |
| H | 4.17213300  | 2.03938100  | 0.08668600  |
| C | -0.46860600 | -0.77280900 | -3.25140000 |
| H | -1.30365900 | -1.28191200 | -2.78463700 |
| H | -0.69218700 | -0.18665600 | -4.13475700 |
| C | 0.89724100  | -1.27357300 | -3.02609100 |
| H | 1.67947800  | -1.05648200 | -3.74356100 |
| H | 1.04553200  | -2.14329500 | -2.39674800 |

**a point for Comp-F**

|    |             |             |             |
|----|-------------|-------------|-------------|
| Fe | -0.27767700 | 0.00903400  | -0.30122800 |
| O  | 0.08860100  | -0.00471100 | 1.43052600  |

|   |             |             |             |
|---|-------------|-------------|-------------|
| N | 0.70945300  | 1.74345000  | -0.53228700 |
| N | 1.41157800  | -0.98212600 | -0.50862700 |
| N | -1.27804400 | -1.72670700 | -0.13731300 |
| N | -1.90178900 | 0.99781700  | 0.20670600  |
| C | 2.05127200  | 1.90647000  | -0.80571800 |
| C | 2.97874900  | 0.88977600  | -0.88788800 |
| C | 2.67508400  | -0.44777000 | -0.73624700 |
| C | 3.63349100  | -1.50480400 | -0.86898500 |
| C | 2.95441000  | -2.68469500 | -0.74688400 |
| C | 1.57483600  | -2.36285700 | -0.53703700 |
| C | 0.57101100  | -3.30476200 | -0.44443600 |
| C | -0.76212800 | -2.99887500 | -0.26931400 |
| C | -1.81047000 | -3.97723300 | -0.11272900 |
| C | -2.95715500 | -3.29127400 | 0.14836700  |
| C | -2.61690400 | -1.88961200 | 0.15109800  |
| C | -3.49431000 | -0.87356200 | 0.46590500  |
| C | -3.15055200 | 0.46264000  | 0.50221400  |
| C | -4.07932300 | 1.51825800  | 0.77881600  |
| C | -3.40845000 | 2.69900300  | 0.62766000  |
| C | -2.06114700 | 2.37847500  | 0.25943300  |
| C | -1.10299700 | 3.32152000  | -0.05286700 |
| C | 0.18760700  | 3.01611100  | -0.43110300 |
| C | 1.21270200  | 3.99490700  | -0.69949100 |
| C | 2.36555500  | 3.30866800  | -0.92912900 |
| H | 4.68638800  | -1.35383300 | -1.05486500 |
| H | -1.66523800 | -5.04509000 | -0.18069500 |
| H | -3.94614400 | -3.68073000 | 0.33875000  |
| H | -3.78869200 | 3.70399300  | 0.73437200  |
| H | 3.34845000  | 3.69768900  | -1.14890600 |
| H | -5.11739200 | 1.36493400  | 1.03304700  |
| H | 1.05503700  | 5.06306300  | -0.69216600 |
| H | 3.34189900  | -3.69033000 | -0.81253000 |
| F | -0.65023000 | 0.02647300  | -2.04023800 |
| H | -1.38332200 | 4.36618400  | 0.01067700  |
| H | -4.51930700 | -1.13724200 | 0.69819300  |
| H | 4.01073400  | 1.15507100  | -1.08394700 |
| H | 0.85123500  | -4.34963200 | -0.50650300 |
| C | 2.84654600  | 0.24781200  | 3.36814600  |
| H | 1.95421600  | 0.18106300  | 2.75173700  |
| H | 2.80615300  | 0.93426600  | 4.21069100  |
| C | 3.94398200  | -0.46342900 | 3.10098800  |
| H | 4.84212000  | -0.39183700 | 3.70951600  |
| H | 3.98747300  | -1.14866300 | 2.25833600  |

**a point for Comp-Ac**

|    |             |             |             |
|----|-------------|-------------|-------------|
| Fe | -0.05349600 | 0.12294200  | -0.13495300 |
| O  | 0.13800100  | 0.17278600  | -1.76553600 |
| N  | -0.11975900 | -1.88339400 | -0.09620700 |
| N  | 1.93099700  | 0.03612000  | 0.27751600  |
| N  | 0.03675600  | 2.12542400  | -0.03473000 |

|   |             |             |             |
|---|-------------|-------------|-------------|
| N | -1.97283800 | 0.20084600  | -0.50742100 |
| C | 0.88543100  | -2.75412000 | 0.27999800  |
| C | 2.17262700  | -2.37945100 | 0.61691700  |
| C | 2.66701600  | -1.07925400 | 0.58561000  |
| C | 4.04180900  | -0.72539800 | 0.83762900  |
| C | 4.13355900  | 0.62594700  | 0.66983300  |
| C | 2.80940400  | 1.09048100  | 0.33912900  |
| C | 2.45807600  | 2.42614100  | 0.20639200  |
| C | 1.16646100  | 2.90651700  | 0.06208700  |
| C | 0.81196400  | 4.30442400  | 0.04054600  |
| C | -0.54646800 | 4.36416000  | -0.06065800 |
| C | -1.01606900 | 3.00156300  | -0.12389200 |
| C | -2.33253900 | 2.62180200  | -0.34918100 |
| C | -2.76300800 | 1.32394700  | -0.57633800 |
| C | -4.09716100 | 0.96651900  | -0.99774900 |
| C | -4.09614500 | -0.37545300 | -1.21740300 |
| C | -2.77209500 | -0.85405400 | -0.90187800 |
| C | -2.39841500 | -2.18189200 | -0.91221200 |
| C | -1.16842600 | -2.67026200 | -0.48308800 |
| C | -0.83482500 | -4.06653700 | -0.34396100 |
| C | 0.43563700  | -4.11848700 | 0.14865100  |
| H | 4.82062400  | -1.42446800 | 1.10400100  |
| H | 1.51771300  | 5.11945400  | 0.10206800  |
| H | -1.17932300 | 5.23781700  | -0.10606800 |
| H | -4.91216900 | -1.00231400 | -1.54365700 |
| H | 1.02929300  | -4.98864500 | 0.38647800  |
| H | -4.91078200 | 1.66609200  | -1.11639300 |
| H | -1.49723900 | -4.88555600 | -0.58076100 |
| H | 5.00113400  | 1.25957400  | 0.77884400  |
| O | -0.25867600 | 0.12264800  | 1.79659000  |
| O | -2.15435800 | -1.11133600 | 2.13729700  |
| C | -0.93111800 | -0.24323100 | 4.02973300  |
| H | -0.91042100 | 0.82804100  | 4.25210600  |
| H | 0.04656900  | -0.65118500 | 4.30436700  |
| H | -1.71191200 | -0.72794300 | 4.61664900  |
| C | -1.17387500 | -0.45360300 | 2.55154400  |
| H | -3.14219400 | -2.90650700 | -1.22633900 |
| H | -3.07477900 | 3.41003100  | -0.41973800 |
| H | 3.25549900  | 3.15909000  | 0.27291300  |
| H | 2.86879400  | -3.16876500 | 0.88109000  |
| C | 2.89803500  | -0.25598400 | -3.04735500 |
| H | 2.95763900  | 0.58543400  | -3.73253600 |
| H | 3.65820900  | -0.29915200 | -2.27276500 |
| C | 1.92555500  | -1.16336400 | -3.13486500 |
| H | 1.84564800  | -1.98982800 | -2.43675500 |
| H | 1.15018600  | -1.10589700 | -3.89255400 |

**a point for Comp-Cl**

|    |            |            |             |
|----|------------|------------|-------------|
| Fe | 0.15907600 | 0.02170100 | -0.03244100 |
| O  | 0.06226300 | 0.05156800 | 1.60735500  |

|    |             |             |             |
|----|-------------|-------------|-------------|
| N  | 2.01056100  | -0.65937300 | 0.09308800  |
| N  | -0.53664900 | -1.87266500 | -0.15431400 |
| N  | -1.73202400 | 0.69551900  | -0.27165700 |
| N  | 0.82769400  | 1.88193500  | -0.02303100 |
| C  | 2.40470100  | -1.97743900 | 0.23601000  |
| C  | 1.56344300  | -3.07249500 | 0.21398100  |
| C  | 0.19073000  | -3.02482500 | 0.00137000  |
| C  | -0.65299600 | -4.18196700 | -0.15573700 |
| C  | -1.90611800 | -3.71761000 | -0.42855100 |
| C  | -1.82675300 | -2.27913800 | -0.41982500 |
| C  | -2.90743400 | -1.43183500 | -0.60618600 |
| C  | -2.86466700 | -0.04924600 | -0.52171300 |
| C  | -4.01426700 | 0.81159700  | -0.63550200 |
| C  | -3.57087900 | 2.08690400  | -0.44217200 |
| C  | -2.14874400 | 2.00137200  | -0.22828100 |
| C  | -1.30789900 | 3.09639300  | -0.06788500 |
| C  | 0.06993700  | 3.03864500  | 0.00682200  |
| C  | 0.92872500  | 4.19564700  | 0.06039000  |
| C  | 2.21010700  | 3.73851100  | 0.04500500  |
| C  | 2.13935600  | 2.29933400  | 0.00277700  |
| C  | 3.23833700  | 1.45797500  | 0.03352700  |
| C  | 3.17380700  | 0.07688000  | 0.10432500  |
| C  | 4.31722300  | -0.78848600 | 0.25184400  |
| C  | 3.84005000  | -2.05913800 | 0.34617700  |
| H  | -0.31728200 | -5.20537000 | -0.08054300 |
| H  | -5.02048200 | 0.47320800  | -0.83255600 |
| H  | -4.13886000 | 3.00501400  | -0.45569800 |
| H  | 3.12713000  | 4.30774300  | 0.06772200  |
| H  | 4.39451400  | -2.97770100 | 0.46665700  |
| H  | 0.58021800  | 5.21703700  | 0.09221900  |
| H  | 5.34222100  | -0.45122400 | 0.28515600  |
| H  | -2.80617900 | -4.28405600 | -0.61516800 |
| Cl | 0.28161400  | -0.02823900 | -2.37373000 |
| C  | -1.64517900 | -0.68870400 | 2.79979300  |
| H  | -0.90871800 | -0.94395900 | 3.55494200  |
| H  | -1.78707300 | -1.41425600 | 2.00529700  |
| C  | -2.40585400 | 0.40583000  | 2.89877800  |
| H  | -3.15472200 | 0.65202800  | 2.15120700  |
| H  | -2.27460000 | 1.12326400  | 3.70397200  |
| H  | 2.01727000  | -4.05154600 | 0.32607200  |
| H  | 4.22141600  | 1.91609300  | 0.04545700  |
| H  | -1.76715200 | 4.07906500  | -0.04541400 |
| H  | -3.87005400 | -1.88917700 | -0.80958200 |

**a point for Comp-NO<sub>3</sub>**

|    |             |             |             |
|----|-------------|-------------|-------------|
| Fe | -0.03856500 | 0.14213300  | -0.15565000 |
| O  | 0.13993100  | 0.22400300  | -1.78375500 |
| N  | -0.19233300 | -1.85286300 | -0.13137400 |
| N  | 1.93808100  | -0.03103300 | 0.21957900  |
| N  | 0.12303100  | 2.12330800  | -0.01692200 |

|   |             |             |             |
|---|-------------|-------------|-------------|
| N | -1.97145100 | 0.30654600  | -0.45125700 |
| C | 0.77381500  | -2.76925900 | 0.23553300  |
| C | 2.08008000  | -2.45255700 | 0.56730000  |
| C | 2.63059800  | -1.17630500 | 0.52355700  |
| C | 4.02580700  | -0.88126500 | 0.73353000  |
| C | 4.17431700  | 0.46177800  | 0.54295100  |
| C | 2.86421800  | 0.98344600  | 0.24553000  |
| C | 2.56300800  | 2.33169600  | 0.12362800  |
| C | 1.28350100  | 2.85976600  | 0.03722300  |
| C | 0.98119900  | 4.26832700  | 0.07879700  |
| C | -0.37737900 | 4.37986500  | 0.07004000  |
| C | -0.90148000 | 3.04040800  | -0.00775400 |
| C | -2.24249400 | 2.72210300  | -0.15553100 |
| C | -2.73054700 | 1.44876300  | -0.41275300 |
| C | -4.09815900 | 1.15290100  | -0.76228300 |
| C | -4.15302100 | -0.17705200 | -1.04424000 |
| C | -2.82861900 | -0.70567700 | -0.83123600 |
| C | -2.50647200 | -2.04716800 | -0.88757400 |
| C | -1.28216800 | -2.59018200 | -0.50747900 |
| C | -1.00992000 | -3.99796800 | -0.37941400 |
| C | 0.26228800  | -4.10908500 | 0.10242200  |
| H | 4.78056200  | -1.61048100 | 0.98802200  |
| H | 1.71887700  | 5.05559100  | 0.12432400  |
| H | -0.97765400 | 5.27681100  | 0.09767700  |
| H | -5.00791100 | -0.76245400 | -1.34785800 |
| H | 0.81533200  | -5.00716200 | 0.33388900  |
| H | -4.89599900 | 1.87961800  | -0.79690100 |
| H | -1.70987900 | -4.78686300 | -0.61043000 |
| H | 5.07384500  | 1.05430500  | 0.61866300  |
| O | -0.13412600 | 0.13861800  | 1.82188200  |
| N | -0.99635900 | -0.51463400 | 2.60154000  |
| O | -2.00422600 | -1.07721900 | 2.09619000  |
| O | -0.74024400 | -0.51812200 | 3.82891000  |
| H | 2.74089400  | -3.27148700 | 0.83039800  |
| H | -3.28946700 | -2.73631300 | -1.18502600 |
| H | -2.95749200 | 3.53724900  | -0.13792400 |
| H | 3.38855500  | 3.03403400  | 0.16552200  |
| C | 2.69443800  | -0.42535500 | -2.96011200 |
| H | 2.92736000  | 0.37987300  | -3.65183400 |
| H | 3.44283200  | -0.63788800 | -2.20210700 |
| C | 1.53808400  | -1.09441900 | -3.02662700 |
| H | 1.30166100  | -1.90507800 | -2.34880200 |
| H | 0.80715000  | -0.88927500 | -3.80054800 |

#### Estimated minimum energy point for Comp-F

|    |             |             |             |
|----|-------------|-------------|-------------|
| Fe | 0.08119700  | 0.03535400  | -0.37726500 |
| O  | 0.19165700  | 0.01059600  | 1.78775000  |
| N  | 0.63483100  | -1.95368600 | -0.17559300 |
| N  | -1.91136100 | -0.54355500 | -0.23919400 |
| N  | -0.50558500 | 2.00925500  | -0.18849400 |

|   |             |             |             |
|---|-------------|-------------|-------------|
| N | 2.04801300  | 0.59772300  | -0.11965500 |
| C | -0.20531200 | -3.04577400 | -0.23562800 |
| C | -1.59699700 | -2.98837200 | -0.29906700 |
| C | -2.38552700 | -1.83752600 | -0.31326900 |
| C | -3.82762900 | -1.80638300 | -0.41168800 |
| C | -4.20643700 | -0.49201700 | -0.40982000 |
| C | -3.00175900 | 0.30173000  | -0.31067900 |
| C | -2.94570900 | 1.69533200  | -0.28834300 |
| C | -1.79755000 | 2.48437900  | -0.22643100 |
| C | -1.76902600 | 3.93124300  | -0.18949000 |
| C | -0.45639500 | 4.30756100  | -0.12977600 |
| C | 0.33678700  | 3.09665600  | -0.13059000 |
| C | 1.72890000  | 3.03874300  | -0.07594100 |
| C | 2.51851600  | 1.89094200  | -0.06534200 |
| C | 3.96366200  | 1.86180300  | 0.01532000  |
| C | 4.34265300  | 0.54890300  | 0.01295200  |
| C | 3.13500500  | -0.24535300 | -0.06851600 |
| C | 3.07723700  | -1.63784000 | -0.08216600 |
| C | 1.92919200  | -2.42641800 | -0.13386400 |
| C | 1.90238200  | -3.87301300 | -0.15859400 |
| C | 0.59107600  | -4.25377100 | -0.22231800 |
| H | -4.46107500 | -2.67875000 | -0.48364000 |
| H | -2.64177900 | 4.56785300  | -0.21093800 |
| H | -0.05444000 | 5.30975500  | -0.09316800 |
| H | 5.34439700  | 0.14722800  | 0.06153500  |
| H | 0.19277700  | -5.25732800 | -0.26203300 |
| H | 4.59729000  | 2.73541000  | 0.06594700  |
| H | 2.77684900  | -4.50722600 | -0.13757600 |
| H | -5.20707400 | -0.09044900 | -0.48040900 |
| F | 0.11486100  | 0.03108200  | -2.21642100 |
| H | 4.02607900  | -2.16383700 | -0.04869200 |
| H | 2.25263700  | 3.98852000  | -0.03377000 |
| H | -2.12100800 | -3.93716100 | -0.35657600 |
| H | -3.89461400 | 2.22024800  | -0.33717300 |
| C | -0.48717000 | -0.88105700 | 2.65284900  |
| H | 0.14300600  | -1.22251400 | 3.47658200  |
| H | -0.92460700 | -1.73704300 | 2.13639300  |
| C | -1.38113500 | 0.20359100  | 2.94180700  |
| H | -2.22824600 | 0.39499500  | 2.29223000  |
| H | -1.12817600 | 0.93828300  | 3.69810300  |
